1 **Reactive astrocyte-driven epileptogenesis is induced by microglia initially**  
2 **activated following status epilepticus**

3

4 **Short title: Inter-glia communication underlies epileptogenesis after**  
5 **status epilepticus**

6

7 Fumikazu Sano<sup>1,2</sup>, Eiji Shigetomi<sup>1</sup>, Youichi Shinozaki<sup>1</sup>, Haruka Tsuzukiyama<sup>1</sup>,  
8 Kozo Saito<sup>1,3</sup>, Katsuhiko Mikoshiba<sup>4</sup>, Kanji Sugita<sup>2</sup>, Masao Aihara<sup>2</sup>, Schuichi  
9 Koizumi<sup>1\*</sup>

10

11 1 Department of Neuropharmacology, Interdisciplinary Graduate School of  
12 Medicine, University of Yamanashi, Yamanashi, Japan,

13 2 Department of Pediatrics, Faculty of Medicine, University of Yamanashi,  
14 Yamanashi, Japan,

15 3 Department of Neurology, Graduate School of Medical Science, Kyoto  
16 Prefectural University of Medicine, Kyoto, Japan,

17 4 Laboratory for Developmental Neurobiology, RIKEN Center for Brain Science,  
18 Saitama, Japan

19

20 [\\*skoizumi@yamanashi.ac.jp](mailto:*skoizumi@yamanashi.ac.jp) (SK)

21

22 **Abbreviations:**

23 2-APB, 2-aminoethoxydiphenyl borate; CPA, cyclopiazonic acid; PBS,

24 phosphate buffered saline; RT-PCR, reverse transcription-polymerase chain

25 reaction; SE, status epilepticus; TTX, tetrodotoxin; WT, wild-type

26

27 **Abstract**

28 Extensive activation of glial cells during a latent period has been well  
29 documented in various animal models of epilepsy; however, it remains unknown  
30 whether such glial activation is capable of promoting epileptogenesis. Here, we  
31 show that temporally distinct activation profiles of microglia and astrocytes  
32 collaboratively contribute to epileptogenesis in a drug-induced status epilepticus  
33 model. We found that reactive microglia appear first, followed by reactive  
34 astrocytes and increased susceptibility to seizures. Pharmacological intervention  
35 against microglial activation reduces astrogliosis, aberrant astrocyte  $\text{Ca}^{2+}$   
36 signaling, and seizure susceptibility. Reactive astrocytes exhibit larger  $\text{Ca}^{2+}$   
37 signals mediated by  $\text{IP}_3\text{R}2$ , whereas deletion of this type of  $\text{Ca}^{2+}$  signaling  
38 reduces seizure susceptibility after status epilepticus. Together, our findings  
39 indicate that the sequential activation of glial cells constitutes a cause of  
40 epileptogenesis after status epilepticus.

41

42

## 43 **Introduction**

44 Epileptogenesis; i.e., the process leading to epilepsy, is a common sequel of  
45 brain insults such as brain injury, cerebrovascular disease, or status epilepticus  
46 (SE) [1,2] Such brain insults are typically followed by a latent period, during  
47 which the brain undergoes a cascade of morphological and functional changes  
48 over month to years prior to the onset of chronic epilepsy [3,4]. Extensive  
49 activation of glial cells, including microglia and astrocytes, has been well  
50 documented during this latent period in various animal models of epilepsy [5–7].  
51 Although the association of pathology with reactive glial cells is widely  
52 recognized, it is unclear whether such microglial and astrocytic activation  
53 constitutes primary causes of epilepsy or rather represents the results of  
54 repeated seizures. Moreover, the potential for these reactive glial cells to  
55 comprise candidates for epileptogenesis raises the further mechanistic question  
56 regarding whether activated glial cells might contribute to epileptogenesis  
57 independently or collaboratively.

58 In chemoconvulsant-induced epilepsy models, microglia are activated and  
59 produce pro-inflammatory mediators immediately following seizure onset [8].  
60 Activated microglia can decrease the seizure threshold in animal models by

61 releasing pro-inflammatory molecules with neuromodulatory properties [9].  
62 Notably, the extent of microglial activation correlates with the seizure frequency  
63 in human drug-resistant epilepsy [10]. Alternatively, such microglial activation  
64 may not persist chronically. For example, pro-inflammatory molecules are  
65 detectable in microglia following a seizure but the expression diminishes after  
66 several hours [11]. Furthermore, although the activation of microglia is well  
67 characterized, it is unclear whether these activated microglia affect developing  
68 epileptogenic processes directly or through the modulation of other cells, such  
69 as subsequent astrocytic activation.

70 Reactive astrogliosis is also one of the most common pathological features in  
71 epilepsy and other brain insults [12,13]. Although reactive astrogliosis is  
72 considered the consequence of repetitive seizures, some evidence that reactive  
73 astrocytes may be responsible for repetitive seizures is available. In the epileptic  
74 brain, reactive astrocytes exhibit physiological and molecular changes, such as  
75 reduced inward rectifying K<sup>+</sup> current [14], changes in transporters [15], or  
76 release of gliotransmitters [16] that may underlie neuronal hyperexcitability [17].  
77 Although astrocytes do not exhibit prominent electrical excitability as observed in  
78 neurons, they are able to dynamically regulate calcium using internal stores

79 [18,19]. Calcium transients in astrocytes are thought to modulate the release of a  
80 number of gliotransmitters that could influence synaptic function, synapse  
81 formation [20–22], and neural circuit excitability [23]. In particular, several  
82 previous studies showed that astrocyte calcium activity could contribute to  
83 excitotoxic neuronal death through glutamate release following SE [24,25].

84 However, the functional changes including  $\text{Ca}^{2+}$  signaling of reactive astrocytes  
85 after SE and their causal roles in epileptogenesis remain largely uncertain.

86 To evaluate the role of inter-gial communication between different types of  
87 glial cells in the process of epileptogenesis, we assessed the spatiotemporal  
88 dynamics of glial activation following SE. Using cell-type specific manipulation,  
89 we show that relative alterations of both microglia and astrocytes play causal  
90 roles in epileptogenesis. Moreover, reactive glia are temporally distinct and  
91 collaboratively contribute to epileptogenesis. Reactive microglia appear first and  
92 induce reactive astrocytes in the hippocampus after SE. These reactive  
93 astrocytes present larger  $\text{IP}_3\text{R}2$ -mediated  $\text{Ca}^{2+}$  signals, which are essential for  
94 induction of the increased seizure susceptibility after SE. We clearly  
95 demonstrate that inhibition of microglial activation reduces astrogliosis, aberrant  
96 astrocytic  $\text{Ca}^{2+}$  signaling, and seizure susceptibility. We therefore conclude that

97 the sequential activation of glial cells; i.e., the initial activation of microglia  
98 followed by astrocytic activation, is a cause of epileptogenesis after SE.

99

100

## 101 **Results**

### 102 **Astrocytic activation follows microglial activation after SE**

103 To determine the contributions of glial cells to epileptogenesis, we used the  
104 pilocarpine model of epilepsy in mice, a model known to be highly isomorphic  
105 with human temporal lobe epilepsy [26,27]. Repeated low doses of pilocarpine  
106 (100 mg kg<sup>-1</sup>) were injected intraperitoneally (i.p.) until the onset of SE (Fig 1A).  
107 This ramping protocol has been shown to reduce mortality after SE [28,29]. To  
108 investigate how glial cell activation affects the epileptogenic process, we first  
109 examined the spatiotemporal pattern of microglial and astrocytic activation in the  
110 hippocampus following SE. We initially assessed microglial and astrocytic  
111 activation with immunohistochemistry using cell-type-specific activation markers  
112 at 1, 3, 7, and 28 days after SE (Fig 1B and 1D). The area of Iba1-positive  
113 microglia was significantly increased in CA1 from 1 to 7 days after SE, which  
114 was followed by an increase in the area of GFAP-positive astrocytes in CA1 from



115 7 to 28 days after SE (Fig 1C and 1E).

116

117 **Fig 1. Astrogliosis is observed following microglial activation after SE.**

118 (A) As shown in the experimental protocols, mice were administered pilocarpine

119 to achieve stage 5 seizures. The second SE was induced using the same

120 protocol 4 weeks after the first SE. SP (PP) indicates that mice were injected

121 with saline (pilocarpine) at 8 weeks of age followed by an injection of pilocarpine

122 at 12 weeks of age. (B and C) Representative microphotographs showing the

123 spatiotemporal characteristics of Iba-1 (B) or GFAP (C) expression in CA1 after

124 SE. Fifteen images were captured per z-stack image (0.5  $\mu\text{m}$  step). Cont,

125 control; D, day. (D and E) Quantification of the temporal profile of Iba-1 positive

126 microglia (D) or GFAP positive astrocytes (E) after SE (n = 5 mice (D); n = 5, 5,

127 5, 5, 7 mice, (E), \* $P < 0.05$ , \*\* $P < 0.01$  vs. control, one-way ANOVA ( $P < 0.001$ )

128 with Dunnett's test). (F) Dot plots showing dose of pilocarpine required for the

129 induction of the second SE (n = 14, 13 mice, \* $P < 0.05$ , Mann–Whitney U-test).

130 (G) Scatter plot showing dose of pilocarpine required for the induction of the first

131 (at 8 weeks of age) and second (at 12 weeks of age) SE in the PP group (n = 13

132 mice, \*\* $P < 0.01$ , Wilcoxon signed-rank test). Values represent the means  $\pm$

133 SEM.

134

135 To examine whether the first SE increased seizure susceptibility, the second  
136 SE was induced 4 weeks after the first SE. A lower dose of pilocarpine was  
137 required for the induction of the second SE in mice with prior exposure to  
138 pilocarpine-induced SE at 8 weeks of age (PP) compared to those without such  
139 exposure (SP) (Fig 1F). In addition, a lower dose of pilocarpine was required for  
140 the induction of the second SE compared to the first SE (Fig 1G). These data  
141 indicated that the first SE increased seizure susceptibility at 4 weeks after the  
142 first SE. A comparison with the results in Fig 1 suggested that the temporal  
143 pattern of astrocyte activation, rather than that of microglia, correlates well with  
144 the increase of seizure susceptibility.

145

#### 146 **Ca<sup>2+</sup> hyperactivity via IP<sub>3</sub>R2 in reactive astrocytes after SE**

147 To examine the SE-induced functional changes in astrocytes, Ca<sup>2+</sup> imaging was  
148 performed from hippocampal slices prepared from wild-type (WT) and  
149 Glax-CreERT2::flx-GCaMP3 mice [30,31]. Astrocytes displayed significantly  
150 larger and more frequent Ca<sup>2+</sup> signals approximately 4 weeks after SE (S1

151 Movie). To test whether hyperactivity of astrocytes is influenced by neuronal  
152 hyperactivity, we blocked neuronal transmission by topically applying the  
153 voltage-gated sodium channel blocker tetrodotoxin (TTX; 1  $\mu$ M). TTX did not  
154 affect the amplitude of astrocytic Ca<sup>2+</sup> signals (Fig 2A, 2D and 2E) (S2 Movie).

155

156 **Fig 2. Reactive astrocytes exhibit IP<sub>3</sub>R2-mediated Ca<sup>2+</sup> hyperactivity, which**  
157 **is essential for epileptogenesis.**

158 (A-C) Ca<sup>2+</sup> dynamics of astrocytes approximately 4 weeks after SE in the CA1  
159 stratum radiatum region in Glax-CreERT2::flx-GCaMP3 mice before and after  
160 TTX (1  $\mu$ M) (A), CPA (20  $\mu$ M) (B), and 2-APB (100  $\mu$ M) (C) application. (D-I) Box  
161 plots showing amplitudes of Ca<sup>2+</sup> signals before and after TTX (1  $\mu$ M) (D), CPA  
162 (20  $\mu$ M) (F), and 2-APB (100  $\mu$ M) (H) application. (n = 10, 13, 14 cells/2 mice,  
163 \*\*\**P* < 0.001, unpaired t-test). Cont, control. Cumulative probability plots  
164 showing amplitudes (dF/F) of Ca<sup>2+</sup> signals before and after TTX (not significant  
165 (*P* > 0.05), Kolmogorov–Smirnov test) (E), CPA (*P* < 0.001, Kolmogorov–  
166 Smirnov test) (G), and 2-APB (*P* < 0.001, Kolmogorov–Smirnov test) (I)  
167 application. (J) Astrocytic Ca<sup>2+</sup> dynamics by Fluo4 in the CA1 stratum radiatum  
168 region in WT control, WT after SE, and IP<sub>3</sub>R2KO mice after SE. (K-N) Box plots

169 showing  $\text{Ca}^{2+}$  signal amplitudes (dF/F) (K) and frequency (M) ( $n = 57, 32, 85$   
170 cells/2, 2, 3 mice,  $***P < 0.001$ , unpaired t-test). Cumulative probability plots  
171 showing  $\text{Ca}^{2+}$  signal amplitudes (dF/F) (L) and frequency (N) ( $P < 0.001$ ,  
172 Kolmogorov–Smirnov test). (O) Dot plots showing dose of pilocarpine required  
173 for the induction of the second SE in  $\text{IP}_3\text{R2KO}$  mice. SP (PP) indicates mice  
174 were injected with saline (pilocarpine) at 8 weeks of age followed by an injection  
175 of pilocarpine at 12 weeks of age. ( $n = 10$  mice, N.S., not significant ( $P > 0.05$ ),  
176 Mann–Whitney U-test). (P) Scatter plot showing dose of pilocarpine required for  
177 the induction of the first (at 8 weeks of age) and second (at 12 weeks of age) SE  
178 in the PP group regarding  $\text{IP}_3\text{R2KO}$  mice ( $n = 10$  mice, N.S., not significant ( $P >$   
179  $0.05$ ), Wilcoxon signed-rank test). Note: The first pilocarpine did not affect the  
180 dose required for the second SE in  $\text{IP}_3\text{R2KO}$ , see Fig 1G.

181

182 To elucidate the molecular mechanisms involved in astrocytic  $\text{Ca}^{2+}$   
183 hyperactivity, we applied cyclopiazonic acid (CPA;  $20 \mu\text{M}$ ) to deplete intracellular  
184 calcium stores. CPA significantly reduced the amplitude of astrocytic  $\text{Ca}^{2+}$   
185 signals after SE (Fig 2B, 2F and G) (S2 Movie). Then, we applied the  
186 membrane-permeable  $\text{IP}_3$  receptor antagonist 2-aminoethoxydiphenyl borate

187 (2-APB; 100  $\mu$ M). 2-APB also significantly reduced the amplitude of astrocytic  
188  $\text{Ca}^{2+}$  signals after SE (Fig 2C, 2H and 2I) (S4 Movie). To confirm that astrocytic  
189  $\text{Ca}^{2+}$  hyperactivity is completely dependent on the  $\text{IP}_3$  receptor, we performed  
190  $\text{Ca}^{2+}$  imaging in  $\text{IP}_3\text{R2}$  knockout (KO) mice [32]. The amplitude of astrocytic  $\text{Ca}^{2+}$   
191 signals after SE was significantly decreased in  $\text{IP}_3\text{R2KO}$  mice compared with  
192 that in WT (Fig 2J, 2K, 2L, 2M and 2N). The frequency of astrocytic  $\text{Ca}^{2+}$  signals  
193 after SE was also significantly decreased in  $\text{IP}_3\text{R2KO}$  mice (Fig 2M and 2N) (S5  
194 Movie). These results suggested that astrocytic  $\text{Ca}^{2+}$  hyperactivity after SE  
195 should be dependent on  $\text{IP}_3\text{R2}$ -mediated  $\text{Ca}^{2+}$  release from internal stores.

196

### 197 **$\text{IP}_3\text{R2KO}$ mice exhibit rescue of the increased seizure susceptibility**

198 To clarify the role of astrocytic  $\text{Ca}^{2+}$  hyperactivity after SE in epileptogenesis, we  
199 investigated seizure susceptibility after SE in  $\text{IP}_3\text{R2KO}$  mice [32]. No differences  
200 in the dose of pilocarpine required for the induction of the first SE were observed  
201 between  $\text{IP}_3\text{R2KO}$  and WT mice (Fig 1F and 2O). These data indicated that  
202  $\text{IP}_3\text{R2}$ -mediated  $\text{Ca}^{2+}$  signaling in astrocytes does not alter the acute responses  
203 to pilocarpine.

204 In  $\text{IP}_3\text{R2KO}$  mice, the area of Iba1-positive microglia was significantly

205 increased in CA1 at 1 day after SE, suggesting that microglial activation after SE  
206 was comparable in IP<sub>3</sub>R2KO and WT mice (S1 Fig). However, there was no  
207 significant change in the dose of pilocarpine required for the induction of the  
208 second SE in SP compared with PP mice (Fig 2O). There was no significant  
209 change in the dose of pilocarpine required for the induction of the first and  
210 second SE in IP<sub>3</sub>R2KO mice (Fig 2P). These results suggested that  
211 IP<sub>3</sub>R2-mediated astrocytic Ca<sup>2+</sup> hyperactivity is essential for the induction of the  
212 increased seizure susceptibility after SE.

213

#### 214 **Microglia inhibition reduces activated astrocyte morphology**

215 Our data indicated temporal differences between activation of microglia and  
216 astrocytes; i.e., earlier and later onset after SE, respectively. To reveal features  
217 of the activated microglia after SE, we investigated the changes in mRNA levels  
218 of pro-inflammatory cytokines that are relevant to microglial activation by  
219 quantitative reverse transcription-polymerase chain reaction (RT-PCR) (Fig 3A,  
220 3B and 3C). SE increased *Tnf* and *I11b* mRNA in the hippocampus at 1 day after  
221 SE (Fig 3B and 3C). To explore the microglia-triggered astrocyte activation, we  
222 investigated microglial functional changes after SE. Among several molecules

223 tested, we found that *Tnf* and *I11b* mRNAs were also significantly upregulated in  
224 the isolated hippocampal microglia at 1 day after SE (Fig 3A).

225

226 **Fig 3. Microglia inhibition with minocycline and depletion with CSF1R**  
227 **antagonist (PLX5622) reduces astrogliosis.**

228 (A) Microfluidic quantitative RT-PCR analysis of mRNA in total RNA extracted  
229 from hippocampal microglia after SE. Relative ratios of *Gapdh*-normalized  
230 mRNA to the corresponding control (Cont) are shown (n = 3 samples/9 mice,  
231 \*\*\* $P < 0.001$  vs. control, one-way ANOVA ( $P < 0.01$ ,  $P < 0.001$ ) with Dunnett's  
232 test). (B and C) Quantitative RT-PCR analysis of *Tnf* and *I11b* mRNA in total  
233 hippocampal RNA after SE. Relative ratios of *Gapdh*-normalized mRNA to the  
234 corresponding control are shown (n = 5 mice, \* $P < 0.05$ , \*\*\* $P < 0.001$  vs. control,  
235 one-way ANOVA ( $P < 0.001$ ,  $P < 0.05$ ) with Dunnett's test). (D) Experimental  
236 scheme for minocycline post-treatment-mediated microglia inhibition. (E-H)  
237 Representative microphotographs showing the spatiotemporal characteristics of  
238 Iba-1 (E) and GFAP (F) expression and quantification of Iba-1 positive microglia  
239 (G) and GFAP positive astrocytes (H) in CA1 with or without minocycline  
240 post-treatment after SE. Fifteen images were collected per z-stack image (0.5

241  $\mu\text{m}$  step). (n = 5 mice, N.S., not significant ( $P > 0.05$ ),  $*P < 0.05$ ,  $***P < 0.001$ ,  
242 one-way ANOVA ( $P < 0.01$ ) with Bonferroni test). (I and J) Quantitative RT-PCR  
243 analysis as in (B and C) with or without minocycline post-treatment. (n = 5 mice,  
244 N.S., not significant ( $P > 0.05$ ),  $*P < 0.05$ , unpaired t-test). (K) Experimental  
245 scheme for PLX5622-mediated microglia depletion. (L-O) Representative  
246 microphotographs showing the spatiotemporal characteristics of Iba-1 (L) and  
247 GFAP (M) expression and quantification of Iba-1 positive microglia (N) and  
248 GFAP positive astrocytes (O) in CA1 with or without PLX5622 after SE. Fifteen  
249 images were captured per z-stack image ( $0.5 \mu\text{m}$  step). (n = 5 mice,  $*P < 0.05$ ,  
250  $**P < 0.01$  vs. control of AIN-76A (control diet),  $###P < 0.01$  vs. control of  
251 PLX5622,  $\$P < 0.05$ ,  $\$\$P < 0.01$ ,  $\$\$\$P < 0.001$  vs. AIN-76A (corresponding day),  
252 one-way ANOVA ( $P < 0.01$ ) with Dunnett's test and unpaired t-test). (P)  
253 Quantitative RT-PCR analysis as in (B and C) with or without PLX5622. (n = 5  
254 mice,  $*P < 0.05$ ,  $**P < 0.01$ , unpaired t-test).

255

256 To clarify whether microglial activation is required for astrogliosis, we  
257 investigated the effect of post-treatment with the inhibitor, minocycline (Fig 3D)  
258 [33–35]. To confirm the efficacy of minocycline in this protocol, microglial



259 activation was assessed by immunohistochemistry and quantitative RT-PCR.  
260 Minocycline post-treatment prevented the increase in the area of Iba1-positive  
261 cells in CA1 at 3 days after the first SE (Fig 3E and 3G) along with an increase in  
262 *Tnf* but not *I1b* mRNA in the hippocampus at 1 day after the first SE (Fig 3I and  
263 3J). Notably, microglia inhibition with minocycline post-treatment prevented the  
264 increase in the area of GFAP-positive cells in CA1 at 28 days after the first SE  
265 (Fig 3F and 3H).

266 To further confirm that acute microglial activation plays an important role in  
267 the morphological activation of astrocytes after SE, we applied PLX5622, a  
268 CSF1R antagonist, to deplete microglia (Fig 3K) [36–38]. PLX5622 treatment  
269 prevented the increase in the area of Iba1-positive cells in CA1 from 1 to 7 days  
270 after the first SE (Fig 3L and 3N). In addition, *Aif1* and *Tnf* mRNA levels were  
271 significantly decreased at 1 day after SE with PLX5622 treatment compared with  
272 those in the control diet group (Fig 3P). Similarly, the increased area of  
273 GFAP-positive astrocytes in CA1 from 7 to 28 days after SE in control diet  
274 (AIN-76A) mice was prevented in PLX5622 treated mice (Fig 3M and 3O). To  
275 identify the optimal timing of microglial inhibition to prevent astrogliosis, we  
276 applied PLX5622 from 3 weeks after SE (Fig 4A). This later PLX5622 treatment

277 decreased the area of Iba1-positive cells in CA1 at 28 days after the first SE (Fig  
278 4B and 4D) but did not prevent the increased area of GFAP-positive astrocytes  
279 (Fig 4C and 4E). These findings showed that the initial reactive microglia are  
280 required to induce morphological activation of astrocytes after SE.

281

282 **Fig 4. Microglia depletion with CSF1R antagonist (PLX5622) at late phase**  
283 **after SE does not reduce astrogliosis and increased seizure susceptibility.**

284 (A) Experimental scheme for microglia depletion with PLX5622 at the late phase  
285 after SE. (B and C) Representative microphotographs showing the  
286 spatiotemporal feature of Iba-1 (B) and GFAP (C) expression in CA1 with or  
287 without PLX5622 after SE. Fifteen images were collected per z-stack image (0.5  
288  $\mu\text{m}$  step). Cont, control; D, day. (D and E) Quantification of the temporal profile  
289 of Iba-1 positive microglia (D) and GFAP positive astrocytes (E) after SE (n = 5  
290 mice,  $***P < 0.01$  vs. control, unpaired t-test,  $###P < 0.01$  vs. AIN-76A  
291 (corresponding day), one-way ANOVA ( $P < 0.001$ ) with Dunnett's test). Values  
292 represent the means  $\pm$  SEM.

293

294 **Microglia inhibition reduces astrocytic  $\text{Ca}^{2+}$  hyperactivity**

295 We then investigated whether microglial activation is required for astrocytic Ca<sup>2+</sup>  
296 hyperactivity after SE. We also used a pharmacological approach to inhibit the  
297 early microglial activation after SE. Microglia inhibition with minocycline reduced  
298 the larger and frequent Ca<sup>2+</sup> signals of astrocytes (S1 Movie) (Fig 5A, 5B, 5C,  
299 5D and 5E). Similarly, the amplitude and frequency of fluo-4AM-labeled  
300 astrocytic Ca<sup>2+</sup> signaling after SE were significantly increased in control diet  
301 (AIN-76A) mice (Fig 5F, 5H, 5I, 5J and 5K) (S6 Movie). Conversely, the larger  
302 and frequent Ca<sup>2+</sup> signals after SE were significantly reduced by the PLX5622  
303 treatment (Fig 5G, 5L, 5M, 5N and 5O) (S7 Movie). These results indicated that  
304 acute microglial activation is essential for the changes of astrocytic Ca<sup>2+</sup> activity  
305 after SE.

306

307 **Fig 5. Microglia inhibition with minocycline or CSF1R antagonist (PLX5622)**  
308 **reduces the increased astrocytic Ca<sup>2+</sup> hyperactivity following SE.**

309 (A) Ca<sup>2+</sup> dynamics of astrocytes approximately 4 weeks after SE in the CA1  
310 stratum radiatum region in Glaxt-CreERT2::flx-GCaMP3 mice with or without  
311 minocycline treatment. (B-E) Box plots showing Ca<sup>2+</sup> signal amplitude (dF/F) (B)  
312 and frequency (D) (n = 74, 92, 93 cells/3 mice, N.S., not significant (*P* > 0.05),

313 \*\*\* $P < 0.001$ , unpaired t-test). Cumulative probability plots showing  $\text{Ca}^{2+}$  signal  
314 amplitude (dF/F) ( $P < 0.001$ , Kolmogorov–Smirnov test) (C) and frequency (not  
315 significant ( $P > 0.05$ ), Kolmogorov–Smirnov test) (E). (F and G)  $\text{Ca}^{2+}$  dynamics  
316 of astrocytes approximately 4 weeks after SE in the CA1 stratum radiatum  
317 region in *Glast-CreERT2::flx-GCaMP3* mice with (G) or without (F) PLX5622  
318 treatment. (H-K) Box plots showing  $\text{Ca}^{2+}$  signal amplitude (dF/F) (H) and  
319 frequency (J) in the AIN-76A (control diet) group. (n = 70, 58 cells/2 mice, \*\*\* $P <$   
320 0.001, unpaired t-test). Cumulative probability plots showing  $\text{Ca}^{2+}$  signal  
321 amplitude (dF/F) ( $P < 0.001$ , Kolmogorov–Smirnov test) (I) and frequency ( $P <$   
322 0.001, Kolmogorov–Smirnov test) (K) in the AIN-76A (control diet) group. (L-O)  
323 Box plots showing  $\text{Ca}^{2+}$  signal amplitude (dF/F) (L) and frequency (M) in the  
324 PLX5622 group. (n = 61, 71 cells/2 mice, N.S., not significant ( $P > 0.05$ ),  
325 unpaired t-test). Cumulative probability plots showing  $\text{Ca}^{2+}$  signal amplitude  
326 (dF/F) (not significant ( $P > 0.05$ ), Kolmogorov–Smirnov test) (M) and frequency  
327 (not significant ( $P > 0.05$ ), Kolmogorov–Smirnov test) (O) in the PLX5622 group.

328

### 329 **Microglia inhibition rescues enhanced seizure susceptibility**

330 Finally, we tested whether microglia inhibition rescued the increased seizure

331 susceptibility following SE. Post-treatment with minocycline following the first SE  
332 prevented the increased seizure susceptibility (Fig 6A and 6B). No difference  
333 was observed between control diet and PLX5622-treated mice in the dose of  
334 pilocarpine required for the induction of the first SE (Fig 6C), indicating that  
335 microglia inhibition does not alter the acute responses to pilocarpine. In contrast,  
336 a lower dose of pilocarpine was required for the induction of the second SE in  
337 control mice compared with that in PLX5622-treated mice (Fig 6D). Consistent  
338 with this, unlike the enhanced seizure susceptibility observed in control mice  
339 following the first SE (as indicated by the reduced dose of pilocarpine required to  
340 induce the second vs. the first SE), there was no significant change in the dose  
341 of pilocarpine required for the induction of the first or second SE in  
342 PLX5622-treated mice (Fig 6E and 6F). In contrast, a lower dose of pilocarpine  
343 was required for the induction of the second SE in later PLX5622 treatment  
344 mice, similar to that in control diet mice (Fig 6G, 6H, 6I and 6J). These data  
345 suggested that the inhibition of initial microglial activation rescues the increased  
346 seizure susceptibility.

347

348 **Fig 6. Microglia inhibition with minocycline or CSF1R antagonist (PLX5622)**

349 **reduces the increased seizure susceptibility following SE.**

350 (A) Dot plots showing dose of pilocarpine required for the induction of the  
351 second SE (n = 10 mice, N.S., not significant ( $P > 0.05$ ),  $*P < 0.05$ , Mann–  
352 Whitney U-test). SMP (PMP) indicates that mice were injected with saline  
353 (pilocarpine) at 8 weeks of age with minocycline post-treatment followed by an  
354 injection of pilocarpine at 12 weeks of age. (B) Scatter plot showing dose of  
355 pilocarpine required for the induction of the first (at 8 weeks of age) and second  
356 (at 12 weeks of age) SE. (n = 10 mice,  $**P < 0.01$ , Wilcoxon signed-rank test). (C  
357 and D) Dot plots showing dose of pilocarpine required for the induction of the  
358 first (C) and second (D) SE with or without PLX5622. (n = 10, 8 mice, N.S., not  
359 significant ( $P > 0.05$ ),  $**P < 0.01$ , Mann–Whitney U-test). AIN, control diet  
360 (AIN-76A). (E and F) Scatter plot showing dose of pilocarpine required for the  
361 induction of the first (at 8 weeks of age) and second (at 12 weeks of age) SE for  
362 AIN-76A (control diet) (E) or PLX5622 (F). (n = 10, 8 mice, N.S., not significant  
363 ( $P > 0.05$ ),  $**P < 0.01$ , Wilcoxon signed-rank test). (G and H) Dot plots showing  
364 dose of pilocarpine required for the induction of the first (G) and second (H) SE  
365 with or without late PLX5622 treatment. (n = 10 mice, N.S., not significant ( $P >$   
366 0.05), Mann–Whitney U-test). (I and J) Scatter plot showing dose of pilocarpine

367 required for the induction of the first (at 8 weeks of age) and second (at 12  
368 weeks of age) SE AIN-76A (control diet) (I) or PLX5622 (J). (n = 10 mice, \*\* $P <$   
369 0.01, Wilcoxon signed-rank test).

370

## 371 **Discussion**

372 Here, we demonstrate that SE induces sequential activation of glial cells; i.e., the  
373 initial activation of microglia, followed by astrocytic activation, which is essential  
374 for seizure susceptibility or epileptogenesis. The main findings in the present  
375 study are as follows. (1) Microglia are activated and pro-inflammatory cytokines  
376 of microglia are increased immediately after SE. (2) Reactive astrocytes, which  
377 exhibit larger IP<sub>3</sub>R2-mediated Ca<sup>2+</sup> signals, appear following microglial activation  
378 after SE. (3) Genetic deletion of IP<sub>3</sub>R2 rescues both the aberrant Ca<sup>2+</sup> signals in  
379 astrocytes and the increased seizure susceptibility. (4) Pharmacological  
380 inhibition of microglial activation or deletion of microglia reduces astrogliosis  
381 along with aberrant Ca<sup>2+</sup> signals of astrocytes, and rescues the increased  
382 seizure susceptibility. These findings indicate that initially activated microglia are  
383 responsible for the subsequent induction of epileptogenic reactive astrocytes in  
384 vivo.

385        Microglial and astrocytic activation is a common feature of various central  
386 nervous system (CNS) disorders including epilepsy [39–42]. However, the  
387 pathological significance and spatiotemporal pattern of microglial and astrocytic  
388 activation in the epileptogenic process have not been carefully addressed.  
389 Microglial response to SE occurs immediately, with reactive microglia playing  
390 both detrimental and beneficial roles during acute seizures [43]. Although  
391 activated microglia exhibit a neuroprotective role via the P2Y<sub>12</sub> receptor in the  
392 acute phase, they exert proconvulsive effects through the production of  
393 pro-inflammatory cytokines such as IL-1 $\beta$  [11], TNF [44], and IL-6 [45,46].  
394 However, such increase of purinergic receptors and pro-inflammatory cytokines  
395 after SE may be transient [11], and it is unknown how this transient microglial  
396 activation including pro-inflammatory cytokines causes long-term epileptic  
397 potential. Here, we found that inhibiting microglia at the acute phase (0 to 7 days  
398 after SE) but not the late phase (21 to 28 days after SE) reduced susceptibility to  
399 the second SE, suggesting that activated microglia trigger the epileptogenic  
400 process including astrocytic activation, but do not exert a direct proconvulsive  
401 effect on the later phase after SE.

402        In the present study, we demonstrate that astrocytic activation develops



403 slowly starting 7 days after SE, is long lasting, and still observed when mice  
404 show increased seizure susceptibility. Astrogliosis is thought to contribute to the  
405 pathophysiology of epilepsy [47–49]. However, the role of astrogliosis in  
406 epileptogenesis is largely unknown. In particular, it is important to determine  
407 whether activated astrocytes play a proconvulsive or anticonvulsive role in the  
408 epileptic brain. It has been proposed that astrocytic  $\text{Ca}^{2+}$  signaling contributes to  
409 the induction of epileptic seizures and neuronal cell loss by seizures  
410 [27,28,50,51]. In this study, we observed larger  $\text{Ca}^{2+}$  signals in the somatic  
411 regions of astrocytes in the latent phase of epileptogenesis. Analysis of the  $\text{Ca}^{2+}$   
412 signals in astrocytes suggests that these  $\text{Ca}^{2+}$  signals are mediated by  $\text{IP}_3\text{R}2$ .  
413 Notably, we found that genetic deletion of  $\text{IP}_3\text{R}2$  is sufficient to rescue the  
414 increased seizure susceptibility and reduce astrogliosis. Our study thus  
415 suggests that  $\text{IP}_3\text{R}2$ -mediated  $\text{Ca}^{2+}$  signaling in reactive astrocytes plays a  
416 proconvulsive role in the epileptic brain and can contribute to epileptogenesis.

417 Astrocytic  $\text{Ca}^{2+}$  signals may contribute to epileptogenesis through several  
418 mechanisms. Astrocytes impact neural circuit excitability directly by releasing  
419 “gliotransmitters”, such as glutamate [23,52,53]. Astrocytes also increase  
420 neuronal excitability by forming new circuits through the release of synaptogenic

421 molecules [22,54]. However, the functional consequences of these changes in  
422 the context of epileptogenesis remain to be determined. As  $\text{Ca}^{2+}$  serves as a  
423 ubiquitous intracellular signal in the regulation of numerous cellular processes  
424 including exocytosis, proliferation, and gene expression, it is also likely to  
425 regulate many processes in the induction/maintenance of reactive astrocytes  
426 [55,56]. Although it is difficult to exclude the inherent influence on the neural  
427 circuit resulting from the deletion of  $\text{IP}_3\text{R}2$ , we demonstrate that SE induces  
428 neither an increase in  $\text{Ca}^{2+}$  excitation in astrocytes nor proconvulsive effects in  
429  $\text{IP}_3\text{R}2\text{KO}$  mice, suggesting that enhanced  $\text{Ca}^{2+}$  signals in astrocytes are likely  
430 responsible for epileptogenesis.

431 In animal models of epilepsy, reactive astrocytes undergo extensive  
432 physiological changes involving not only  $\text{Ca}^{2+}$  signaling but also ion and  
433 neurotransmitter homeostasis along with intracellular and extracellular water  
434 content, which can cause neuronal hyperexcitability [57–60]. The relative  
435 importance of such functional changes of astrocytes to epileptogenesis will be  
436 investigated in future studies. Recently, it has been reported that activated  
437 microglia can induce neurotoxic reactive astrocytes (i.e., A1 astrocytes), which  
438 release unidentified neurotoxic factors [37,61]. Thus, whether astrogliosis after

439 SE results in a similar phenotype to A1 astrocytes and whether IP<sub>3</sub>-mediated  
440 Ca<sup>2+</sup> signals contribute to the induction of neurotoxic phenotype [56] represent  
441 relevant issues to be addressed in future investigations. Although whether the  
442 astrocytes induced by activated microglia are in a primarily neurotoxic or  
443 neuroprotective state remains largely unknown, our data suggest that the  
444 reactive astrocytes induced by activated microglia after SE exert proconvulsive  
445 effects in the epileptic brain.

446 In this study, we also demonstrate that pro-inflammatory cytokines of  
447 microglia are increased prior to astrocytic activation, suggesting the importance  
448 of microglial activation as an initial process of epileptogenesis. Pharmacological  
449 inhibition and depletion of microglia significantly blocked the activation of  
450 astrocytes and decreased the seizure threshold after SE. Our findings identify  
451 that activated microglia likely promote epileptogenesis by inducing the  
452 proconvulsive phenotype of astrocytes. Although it has been recognized that  
453 microglial activation occurs before reactive astrogliosis in various CNS diseases  
454 [62—64], little was known prior to the present study regarding how  
455 microglial-astrocytic interactions contribute to the pathophysiology of epilepsy.  
456 For example, several previous studies using chemoconvulsant-induced epilepsy

457 models have shown that activated microglia were present immediately after SE  
458 and that functional changes occurred, such as upregulation of pro-inflammatory  
459 cytokines [8,65,66], purinergic receptors [39], and phagocytosis [40].

460 Previous reports also revealed that microglia modulate astrocyte activation  
461 via various molecules, especially pro-inflammatory cytokines [67,68]. Consistent  
462 with this, we found that TNF and IL-1 $\beta$  are significantly upregulated in  
463 hippocampal microglia at 1 day after SE. Conversely, microglia inhibition by  
464 minocycline prevents the increased mRNA of TNF in the hippocampus at 1 day  
465 after the first SE along with subsequent reactive astrogliosis, suggesting a  
466 potential role of pro-inflammatory cytokines from microglia in reactive  
467 astrogliosis after SE. As the effect of minocycline may not be restricted to  
468 microglia, we depleted microglia using a CSF-1 receptor antagonist and found  
469 similar results, suggesting that microglial activation occurs through cytokine  
470 release. Thus, despite the potential problem of specificity owing to the use of  
471 pharmacological inhibition of microglia, we clearly show that initial activation of  
472 microglia and microglia-derived proinflammatory cytokines likely underlie the  
473 subsequent astrogliosis-mediated epileptogenesis. Nevertheless, because the  
474 molecular mechanisms underlying the activation of astrocytes triggered by

475 activated microglia have not been fully clarified, other chemical mediators such  
476 as ATP may also contribute to activate microglia-mediated astrogliosis [69].  
477 Further investigations using more specific interventions are required to elucidate  
478 the precise molecular mechanisms underlying the interaction between microglia  
479 and astrocytes.

480 In summary, our findings identify a sequence of glial activation in the  
481 hippocampus that contributes to the epileptogenic process. In this process,  
482 microglial activation is identified as a crucial event to induce reactive astrocytes.  
483 In turn, astrocytic  $\text{Ca}^{2+}$  activation mediated by  $\text{IP}_3\text{R}2$  was essential for the  
484 induction of epileptogenesis. Our findings add to the emerging view that reactive  
485 astrocytes triggered by microglia have a central role in the pathogenesis of  
486 epilepsy and, given the limited progress of neuron-centered epilepsy research  
487 over the past several years, suggest reactive astrocytes as promising new  
488 targets for the development of alternative and more specific antiepileptic drugs.

489

490

## 491 **Materials and Methods**

### 492 **Animals**

493 All studies used male C57BL/6J mice (SLC Japan, Shizuoka, Japan). IP<sub>3</sub>R2KO  
494 mice on a C57BL/6 background were available from a previous study [32]; their  
495 generation and maintenance have been previously described in detail.  
496 Glast-CreERT2::flx-GCaMP3 mice on a C57BL/6 background were also  
497 available from a previous study [30,31]; their generation and maintenance have  
498 been previously described in detail. In the present study, we performed  
499 immunohistochemistry and confirmed that GCaMP3 was co-localized with  
500 GFAP, an astrocyte marker, but not with Iba1 or NeuN (S2 Fig and S1 Table).  
501 Overall, Ca<sup>2+</sup> signals detected by GCaMP3 were mainly detected from  
502 astrocytes.

503 Mice were housed on a 12 h light (6 am)/dark (6 pm) cycle with ad libitum  
504 access to water and rodent chow. The animals were allowed to adapt to  
505 laboratory conditions for at least 1 week before starting the experiments. All  
506 experimental procedures were performed in accordance with the “Guiding  
507 Principles in the Care and Use of Animals in the Field of Physiologic Sciences”  
508 published by the Physiologic Society of Japan and with the previous approval of

509 the Animal Care Committee of Yamanashi University (Chuo, Yamanashi,  
510 Japan).

511

## 512 **Animal treatments**

513 The first SE was induced in 8-week-old male mice by the administration of  
514 pilocarpine and the second SE was induced 4 weeks after the first SE. A low  
515 dose of 100 mg kg<sup>-1</sup> pilocarpine (Wako, 161-07201) per injection was  
516 administered i.p. every 20 min until the onset of Racine scale stage 5 seizures.  
517 Scopolamin methyl bromide (1 mg kg<sup>-1</sup>, i.p., Wako, 198-07971) was  
518 administered 30 min prior to pilocarpine injection to reduce its peripheral effects  
519 [28,29]. Seizures were terminated with pentobarbital (20 mg kg<sup>-1</sup>, i.p., Kyoritu  
520 Seiyaku) when mice experienced stage 5 seizures for 30 min. Behavior of  
521 pilocarpine-treated mice was observed for 1 h after SE.

522 To establish whether minocycline inhibits acute seizure-induced microglial  
523 activation, mice were administered i.p. with saline or minocycline (25 mg kg<sup>-1</sup>) 1  
524 h after pilocarpine-SE induction and for the following two consecutive days [33–  
525 35]. Microglia were also depleted from mice by treatment with the CSF1R  
526 antagonist, PLX5622 (Plexxikon), formulated in AIN-76A rodent chow (Research

527 Diets). Mice were treated with PLX5622 (1200 mg kg<sup>-1</sup> Chow) or a matched  
528 control diet (AIN-76A) for seven days before SE and for the following seven  
529 consecutive days [36–38].

530

### 531 **Immunohistochemistry**

532 The mice were deeply anesthetized with pentobarbital and perfused  
533 transcardially with phosphate buffered saline (PBS), followed by 4% (w/v)  
534 paraformaldehyde in PBS. The brains were removed, postfixed overnight, then  
535 cryoprotected with 30% (w/v) sucrose in PBS for two days. The brains were  
536 frozen and coronal sections (20 µm) were cut using a cryostat (Leica CM1100).  
537 Slices were washed with PBS three times and treated with 0.1%  
538 Triton-X100/10% NGS for 1 h to block nonspecific binding. The sections were  
539 incubated for two days at 4 °C with the following primary antibodies: monoclonal  
540 rat anti-GFAP (1:2000; Thermo Fisher Scientific, 13-0300), monoclonal mouse  
541 anti-NeuN (1:500; Millipore, MAB377), polyclonal rabbit anti-Iba1 (1:1000; Wako,  
542 019-19741), chicken anti-GFP antibody (1:1000, Thermo Fisher Scientific,  
543 A10262), and rabbit anti-NeuN (1:1,000; Millipore, MABN140). The sections  
544 were washed three times with PBS and then incubated for 2 h at room



545 temperature with secondary antibodies: Alexa 488- or Alexa 546-conjugated  
546 goat anti-mouse/rat/rabbit or chicken IgGs (1:500; Invitrogen, A11029/Thermo  
547 Fisher Scientific, A-11081/Invitrogen, A11035/Thermo Fisher Scientific,  
548 A11039). After washing slices with PBS three times, they were mounted with  
549 Vectashield Mounting Medium (Vector Laboratories). Fluorescence images were  
550 obtained using a confocal laser microscope system (FV-1000; Olympus) or  
551 Keyence fluorescence microscope (BZX-700).

552

### 553 **Standard quantitative RT-PCR**

554 Total RNA was isolated and purified from tissues using the RNeasy Lipid Tissue  
555 Mini Kit (Qiagen) according to the manufacturer's instructions. RT-PCR  
556 amplifications were performed using the One Step PrimeScript RT-PCR Kit  
557 (TaKaRa Bio). RT-PCR amplifications and real-time detection were performed  
558 using an Applied Biosystems 7500 Real-Time PCR System. The thermocycling  
559 parameters were as follows: 5 min at 42 °C for reverse transcription, 10 s at  
560 95 °C for inactivation of the RT enzyme, and 40 cycles of denaturation (5 s at 95  
561 °C) and annealing/extension (34 s at 60 °C). All primer probe sets and reagents  
562 were purchased from Applied Biosystems: rodent *Gapdh* (4308313), mouse *Tnf*

563 (Mm00443260\_g1), mouse *I1b* (Mm00434228\_m1).

564

565 **Dissociated cell suspensions from adult mouse brain**

566 Three 8-week old male mice were perfused with PBS after anesthesia to  
567 eliminate serum vesicles and hippocampi were dissected to comprise one  
568 sample. Tissue dissociation was performed using the gentleMACS dissociator  
569 and the Adult Brain Dissociation Kit (Miltenyi Biotec) according to the  
570 manufacturer's protocol. Briefly, brain tissue was minced and digested with a  
571 proprietary enzyme solution on the gentleMACS dissociator adult brain program.  
572 The cells were then incubated with anti-mouse CD11b-coated microbeads  
573 (Miltenyi Biotec) for 10 min at 4 °C. The cell-bead mix was then washed to  
574 remove unbound beads. Prior to antibody labeling, nonspecific binding to the Fc  
575 receptor was blocked using the FcR Blocking Reagent (Miltenyi Biotec). Cells  
576 were suspended in PBS with 0.5% bovine serum albumin and the cell  
577 suspension was loaded onto an LS Column (Miltenyi Biotec), which was placed  
578 in the magnetic field of a QuadroMACS™ Separator (Miltenyi Biotec). The  
579 magnetically labeled CD11b positive cells were retained within the column and  
580 eluted as the positively selected cell fraction after removing the column from the

581 magnet.

582

### 583 **Microfluidic quantitative RT-PCR**

584 Total RNA was extracted from dissociated cells using the RNeasy Lipid Tissue

585 Mini Kit (Qiagen) and cDNA synthesis performed using the PrimeScript RT-PCR

586 Kit (Perfect Real Time) (TaKaRa Bio). For pre-amplification, up to 100 qPCR

587 assays (primer/probe sets in 20x stock concentration) were pooled and diluted to

588 a 0.2x concentration. For microfluidic qPCR, 1.25  $\mu$ l of each cDNA sample was

589 pre-amplified using 1  $\mu$ l of TaqMan pre-amplification master mix (PN 100-5580,

590 Fluidigm), 1.25  $\mu$ l of the primer pool, and 1.5  $\mu$ l of water. Pre-amplification was

591 performed using a 2 min 95 °C denaturation step and 14 cycles of 15 s at 95 °C

592 and 4 min at 60 °C. Microfluidic quantitative RT-PCR reactions were performed

593 using the 96x96 chips and included 2–3 technical replicates for each

594 combination of sample and assay. For sample mixtures, 2.7  $\mu$ l pre-amplification

595 product was combined with 0.3  $\mu$ l of 20x GE Sample Loading Reagent

596 (85000746, Fluidigm) and 3  $\mu$ l of 2x PCR master mix (4324020, Thermo Fisher

597 Scientific), of which 5  $\mu$ l of was loaded into sample wells. For assay mixtures,

598 equal volumes of TaqMan assay and 2x Assay Loading Reagent (PN85000736,

599 Fluidigm) were combined, and 5  $\mu$ l of the resulting mixture was loaded into  
600 multiple assay wells. RT-PCR amplifications and real-time detection were  
601 performed using the BioMarkHD Real-Time PCR System (Fluidigm). Data from  
602 Fluidigm runs were manually checked for reaction quality prior to analysis, and  
603 Ct values for each gene target were normalized to Ct values for housekeeping  
604 genes. All primer probe sets and reagents were purchased from Integrated DNA  
605 Technologies: rodent *Gapdh* (Mm.PT.39a.1), mouse *Tnf* (Mm.PT.58.12575861),  
606 mouse *Il1b* (Mm.PT.58.41616450), mouse *Cx3cr1* (Mm.PT.58.17555544),  
607 mouse *CD45* (Mm.PT.58.7583849), mouse *CD11b* (Mm.PT.58.14195622),  
608 mouse *CD68* (Mm.PT.58.32698807), mouse *CD206* (Mm.PT.58.42560062),  
609 mouse *Il6* (Mm.PT.58.10005566), mouse *Ifng* (Mm.PT.58.41769240), mouse *Il4*  
610 (Mm.PT.58.32703659), mouse *Il10* (Mm.PT.58.13531087), and mouse *Tgfb*  
611 (Mm.PT.58.11254750).

612

### 613 **Preparation of brain slices and Ca<sup>2+</sup> imaging**

614 The methods used have been described previously [56,70]. Briefly, 8-week-old  
615 male mice were anesthetized with pentobarbital (100 mg kg<sup>-1</sup>, i.p.). Cold cutting  
616 ACSF, composed of 92 mM NaCl, 2.5 mM KCl, 1.2 mM NaH<sub>2</sub>PO<sub>4</sub>, 30 mM

617 NaHCO<sub>3</sub>, 20 mM HEPES, 25 mM D-glucose, 5 mM sodium ascorbate, 2 mM  
618 thiourea, 3 mM sodium pyruvate, 10 mM MgCl<sub>2</sub>, and 0.5 mM CaCl<sub>2</sub> saturated  
619 with 95% O<sub>2</sub>–5% CO<sub>2</sub>, was perfused transcardially. Coronal slices of the  
620 hippocampus (300 μm) were cut using a vibrating microtome (Pro7, Dosaka) in  
621 cutting ACSF. Slices were incubated at 34 °C for 10 min in recovery ACSF,  
622 composed of 93 mM N-methyl-D-glucamine, 93 mM HCl, 2.5 mM KCl, 1.2 mM  
623 NaH<sub>2</sub>PO<sub>4</sub>, 30 mM NaHCO<sub>3</sub>, 20 mM HEPES, 25 mM D-glucose, 5 mM sodium  
624 ascorbate, 2 mM thiourea, 3 mM sodium pyruvate, 10 mM MgCl<sub>2</sub>, and 0.5 mM  
625 CaCl<sub>2</sub> saturated with 95% O<sub>2</sub>–5% CO<sub>2</sub>, and subsequently stored in ACSF  
626 comprising 124 mM NaCl, 2.5 mM KCl, 1.2 mM NaH<sub>2</sub>PO<sub>4</sub>, 24 mM NaHCO<sub>3</sub>, 5  
627 mM HEPES, 12.5 mM D-glucose, 5 mM sodium ascorbate, 2 mM thiourea, 3 mM  
628 sodium pyruvate, 2 mM MgCl<sub>2</sub>, and 2 mM CaCl<sub>2</sub> saturated with 95% O<sub>2</sub> and 5%  
629 CO<sub>2</sub> at room temperature. After 1 h of recovery, slices were submerged in ACSF  
630 at approximately 32 °C. Slices were imaged using an Olympus Fluoview  
631 FVMPE-RS two-photon laser scanning microscope equipped with a Maitai HP  
632 DS-OL laser (Spectra-Physics). We used a 920 nm laser and 510 nm high-pass  
633 emission filter. Astrocytes were selected from the CA1 stratum radiatum region  
634 and were typically 30–50 μm from the slice surface. Images were gathered using

635 a 25× water immersion lens with a numerical aperture of 1.05.

636 For Fluo-4AM measurements, we dropped 2.5 µl Fluo-4AM (2 mM) onto the  
637 hippocampal slices followed by incubation in ACSF for 60 min, then transferred  
638 the slices to dye-free ACSF for at least 30 min prior to experimentation. The final  
639 concentration of Fluo4-AM was 5 µM with 0.02% Pluronic F-127. Astrocytes  
640 were selected from the CA1 stratum radiatum region and were typically 30–50  
641 µm from the slice surface. TTX (1 µM), 2-APB (100 µM), and CPA (20 µM) were  
642 solubilized in ACSF. Baseline astrocytic activity was recorded prior to drug  
643 application. Subsequently, drugs were applied onto the slice for 10 min and  
644 astrocytic activity was recorded for 10 min.

645

#### 646 **Image analysis**

647 Images were acquired using inverted confocal laser-scanning systems (Olympus  
648 FV-1000) at 40× magnification with a 1.30 numerical aperture objective lens.  
649 Information regarding z-stack images is described in the figure legends.  
650 Astrocytes were selected from the CA1 stratum radiatum region and imaged  
651 based on GFAP immunostaining. Microglia were imaged based on Iba1  
652 immunostaining at the CA1 stratum radiatum region. Subsequent images were

653 processed and quantified using ImageJ (US National Institutes of Health; NIH).  
654 For the quantitative analysis of the area containing Iba1 positive microglia, we  
655 randomly chose three fields per mouse. Images were converted to gray scale  
656 and the quantification threshold was set constantly for all specimens within each  
657 experimental group. The percentage of Iba1-positive area was calculated by  
658 dividing the area of Iba1-positive region by the total area of the region of interest.  
659 For the quantitative analysis of GFAP positive cell size, we randomly chose one  
660 field per mouse. Images were converted to gray scale and the quantification  
661 threshold was set constantly for all specimens within each experimental group.  
662 To quantify the GFAP positive cell size, particles were analyzed based on GFAP  
663 immunoreactivity and we chose the three largest GFAP positive cells per field.

664 The methods used for Ca<sup>2+</sup> imaging data analysis have been described  
665 previously [56,70]. Briefly, imaging data were analyzed using ImageJ. We  
666 selected regions of interest from somatic regions of astrocytes by visual  
667 examination of the time lapse image. Using these regions of interest, raw  
668 fluorescence intensity values (F) were taken from the original videos and  
669 converted to delta F/F (dF/F) in Originlab (Origin Lab Corp.). We analyzed Ca<sup>2+</sup>  
670 signals when their dF/F values were greater than 0.2. We analyzed Ca<sup>2+</sup> signals

671 and their amplitude (dF/F) and duration (full width at half maximum) using the  
672 Originlab “peak analysis” function.

673

#### 674 **Statistical analysis**

675 All statistical analyses were performed using SPSS version 19.0 (SPSS Inc.)  
676 software. Data are presented as the means  $\pm$  SEM. Most data were analyzed  
677 using one-way ANOVA followed by Dunnett’s multiple post hoc test for  
678 comparing more than three samples, and two-sample unpaired *t*-tests. *P* values  
679  $<0.05$  were considered as statistically significant.

680

#### 681 **Acknowledgements**

682 We thank Dr. K. Takanashi, Mr. R. Komatsu, Mrs. Y. Fukasawa, Mrs. M.  
683 Tachibana, Mrs. Y. Koseki, and Mrs. Y. Hoshino (Univ. Yamanashi) for technical  
684 assistance, and all members of the Koizumi Laboratory for critical discussion.

685

686



687 **References**

- 688 1. Engel J Jr. Mesial temporal lobe epilepsy: what have we learned?  
689 Neuroscientist. 2001;7(4): 340-52.
- 690 2. Herman ST. Epilepsy after brain insult: targeting epileptogenesis. Neurology.  
691 2002;59(9 Suppl 5): S21-26.
- 692 3. French JA, Williamson PD, Thadani VM, Darcey TM, Mattson RH, Spencer  
693 SS, et al. Characteristics of medial temporal lobe epilepsy: I. Results of history  
694 and physical examination. Ann Neurol. 1993;34(6): 774- 80.
- 695 4. Rakhade SN, Jensen FE. Epileptogenesis in the immature brain: emerging  
696 mechanisms. Nat Rev Neurol. 2009;5(7): 380-391.
- 697 5. Binder DK, Steinhauser C. Functional changes in astroglial cells in epilepsy.  
698 Glia. 2006;54(5): 358-368.
- 699 6. Seifert G, Steinhauser C. Neuron-astrocyte signaling and epilepsy. Exp  
700 Neurol. 2013;244: 4-10.
- 701 7. Shapiro LA, Wang L, Ribak CE. Rapid astrocyte and microglial activation  
702 following pilocarpine-induced seizures in rats. Epilepsia. 2008;49 Suppl 2:  
703 33-41.
- 704 8. Benson MJ, Manzanero S, Borges K. Complex alterations in microglial M1/M2

- 705 markers during the development of epilepsy in two mouse models. *Epilepsia*.  
706 2015;56(6): 895-905.
- 707 9. Vezzani A, French J, Bartfai T, Baram TZ. The role of inflammation in  
708 epilepsy. *Nat Rev Neurol*. 2011;7(1): 31-40.
- 709 10. Boer K, Spliet WG, van Rijen PC, Redeker S, Troost D, Aronica E. Evidence  
710 of activated microglia in focal cortical dysplasia. *J Neuroimmunol*.  
711 2006;173(1-2): 188-195.
- 712 11. Vezzani A, Moneta D, Richichi C, Aliprandi M, Burrows SJ, Ravizza T, et al.  
713 Functional role of inflammatory cytokines and antiinflammatory molecules in  
714 seizures and epileptogenesis. *Epilepsia*. 2002;43 Suppl 5: 30-35.
- 715 12. Cendes F, Sakamoto AC, Spreafico R, Bingaman W, Becker AJ. Epilepsies  
716 associated with hippocampal sclerosis. *Acta Neuropathol*. 2014;128(1): 21-37.
- 717 13. Morizawa YM, Hirayama Y, Ohno N, Shibata S, Shigetomi E, Sui Y, et al.  
718 Author Correction: Reactive astrocytes function as phagocytes after brain  
719 ischemia via ABCA1-mediated pathway. *Nat Commun*. 2017;8(1): 1598.
- 720 14. Haj-Yasein NN, Jensen V, Vindedal GF, Gundersen GA, Klungland A,  
721 Ottersen OP, et al. Evidence that compromised K<sup>+</sup> spatial buffering contributes  
722 to the epileptogenic effect of mutations in the human Kir4.1 gene (KCNJ10).

- 723 Glia. 2011;59(11): 1635-1642.
- 724 15. Tanaka K, Watase K, Manabe T, Yamada K, Watanabe M, Takahashi K, et  
725 al. Epilepsy and exacerbation of brain injury in mice lacking the glutamate  
726 transporter GLT-1. Science. 1997;276(5319): 1699-1702.
- 727 16. Bezzi P, Gundersen V, Galbete JL, Seifert G, Steinhauser C, Pilati E, et al.  
728 Astrocytes contain a vesicular compartment that is competent for regulated  
729 exocytosis of glutamate. Nat Neurosci. 2004;7(6): 613-620.
- 730 17. Devinsky O, Vezzani A, Najjar S, De Lanerolle NC, Rogawski MA. Glia and  
731 epilepsy: excitability and inflammation. Trends Neurosci. 2013;36(3): 174-184.
- 732 18. Charles AC, Merrill JE, Dirksen ER, Sanderson MJ. Intercellular signaling in  
733 glial cells: calcium waves and oscillations in response to mechanical stimulation  
734 and glutamate. Neuron. 1991;6(6): 983-992.
- 735 19. Cornell-Bell AH, Finkbeiner SM, Cooper MS, Smith SJ. Glutamate induces  
736 calcium waves in cultured astrocytes: long-range glial signaling. Science.  
737 1990;247(4941): 470-473.
- 738 20. Allen NJ, Eroglu C. Cell biology of astrocyte-synapse interactions. Neuron.  
739 2017;96(3): 697-708.
- 740 21. Araque A, Carmignoto G, Haydon PG, Oliet SH, Robitaille R, Volterra A.

- 741 Gliotransmitters travel in time and space. *Neuron*. 2014;81(4): 728-739.
- 742 22. Kim SK, Hayashi H, Ishikawa T, Shibata K, Shigetomi E, Shinozaki Y, et al.  
743 Cortical astrocytes rewire somatosensory cortical circuits for peripheral  
744 neuropathic pain. *J Clin Invest*. 2016;126(5): 1983-1997.
- 745 23. Halassa MM, Fellin T, Haydon PG. The tripartite synapse: roles for  
746 gliotransmission in health and disease. *Trends Mol Med*. 2007;13(2): 54-63.
- 747 24. Ding S, Fellin T, Zhu Y, Lee SY, Auberson YP, Meaney DF, et al. Enhanced  
748 astrocytic Ca<sup>2+</sup> signals contribute to neuronal excitotoxicity after status  
749 epilepticus. *J Neurosci*. 2007;27(40): 10674-10684.
- 750 25. Tian GF, Azmi H, Takano T, Xu Q, Peng W, Lin J, et al. An astrocytic basis of  
751 epilepsy. *Nat Med*. 2005;11(9): 973-981.
- 752 26. Curia G, Longo D, Biagini G, Jones RS, Avoli M. The pilocarpine model of  
753 temporal lobe epilepsy. *J Neurosci Methods*. 2008;172(2): 143-157.
- 754 27. Levesque M, Avoli M, Bernard C. Animal models of temporal lobe epilepsy  
755 following systemic chemoconvulsant administration. *J Neurosci Methods*.  
756 2016;260: 45-52.
- 757 28. Clasadonte J, Dong J, Hines DJ, Haydon PG. Astrocyte control of synaptic  
758 NMDA receptors contributes to the progressive development of temporal lobe

- 759 epilepsy. *Proc Natl Acad Sci U S A*. 2013;110(43): 17540-17545.
- 760 29. Groticke I, Hoffmann K, Loscher W. Behavioral alterations in a mouse model  
761 of temporal lobe epilepsy induced by intrahippocampal injection of kainate. *Exp*  
762 *Neurol*. 2008;213(1): 71-83.
- 763 30. Mori T, Tanaka K, Buffo A, Wurst W, Kuhn R, Gotz M. Inducible gene  
764 deletion in astroglia and radial glia--a valuable tool for functional and lineage  
765 analysis. *Glia*. 2006;54(1): 21-34.
- 766 31. Zariwala HA, Borghuis BG, Hoogland TM, Madisen L, Tian L, De Zeeuw CI,  
767 et al. A Cre-dependent GCaMP3 reporter mouse for neuronal imaging in vivo. *J*  
768 *Neurosci*. 2012;32(9): 3131-3141.
- 769 32. Futatsugi A, Nakamura T, Yamada MK, Ebisui E, Nakamura K, Uchida K, et  
770 al. IP3 receptor types 2 and 3 mediate exocrine secretion underlying energy  
771 metabolism. *Science*. 2005;309(5744): 2232-2234.
- 772 33. Abraham J, Fox PD, Condello C, Bartolini A, Koh S. Minocycline attenuates  
773 microglia activation and blocks the long-term epileptogenic effects of early-life  
774 seizures. *Neurobiol Dis*. 2012;46(2): 425-430.
- 775 34. Hirayama Y, Ikeda-Matsuo Y, Notomi S, Enaida H, Kinouchi H, Koizumi S.  
776 Astrocyte-mediated ischemic tolerance. *J Neurosci*. 2015;35(9): 3794-3805.

- 777 35. Matsuda T, Murao N, Katano Y, Juliandi B, Kohyama J, Akira S, et al. TLR9  
778 signalling in microglia attenuates seizure-induced aberrant neurogenesis in the  
779 adult hippocampus. *Nat Commun.* 2015;6: 6514.
- 780 36. Dagher NN, Najafi AR, Kayala KM, Elmore MR, White TE, Medeiros R, et al.  
781 Colony-stimulating factor 1 receptor inhibition prevents microglial plaque  
782 association and improves cognition in 3xTg-AD mice. *J Neuroinflamm.* 2015;12:  
783 139.
- 784 37. Shinozaki Y, Shibata K, Yoshida K, Shigetomi E, Gachet C, Ikenaka K, et al.  
785 Transformation of astrocytes to a neuroprotective phenotype by microglia via  
786 P2Y1 receptor downregulation. *Cell Rep.* 2017;19(6): 1151-1164.
- 787 38. Valdearcos M, Robblee MM, Benjamin DI, Nomura DK, Xu AW, Koliwad SK.  
788 Microglia dictate the impact of saturated fat consumption on hypothalamic  
789 inflammation and neuronal function. *Cell Rep.* 2014;9(6): 2124-2138.
- 790 39. Avignone E, Ulmann L, Levavasseur F, Rassendren F, Audinat E. Status  
791 epilepticus induces a particular microglial activation state characterized by  
792 enhanced purinergic signaling. *J Neurosci.* 2008;28(37): 9133-9144.
- 793 40. Koizumi S, Shigemoto-Mogami Y, Nasu-Tada K, Shinozaki Y, Ohsawa K,  
794 Tsuda M, et al. UDP acting at P2Y6 receptors is a mediator of microglial

- 795 phagocytosis. *Nature*. 2007;446(7139): 1091-1095.
- 796 41. Pekny M, Nilsson M. Astrocyte activation and reactive gliosis. *Glia*.  
797 2005;50(4): 427-434.
- 798 42. Sofroniew MV, Vinters HV. Astrocytes: biology and pathology. *Acta*  
799 *Neuropathol*. 2010;119(1): 7-35.
- 800 43. Eyo UB, Murugan M, Wu LJ. Microglia-neuron communication in epilepsy.  
801 *Glia*. 2017;65(1): 5-18.
- 802 44. Stellwagen D, Beattie EC, Seo JY, Malenka RC. Differential regulation of  
803 AMPA receptor and GABA receptor trafficking by tumor necrosis factor-alpha. *J*  
804 *Neurosci*. 2005;25(12): 3219-3228.
- 805 45. Campbell IL, Abraham CR, Masliah E, Kemper P, Inglis JD, Oldstone MB, et  
806 al. Neurologic disease induced in transgenic mice by cerebral overexpression of  
807 interleukin 6. *Proc Natl Acad Sci U S A*. 1993;90(21): 10061-10065.
- 808 46. Samland H, Huitron-Resendiz S, Masliah E, Criado J, Henriksen SJ,  
809 Campbell IL. Profound increase in sensitivity to glutamatergic- but not  
810 cholinergic agonist-induced seizures in transgenic mice with astrocyte  
811 production of IL-6. *J Neurosci Res*. 2003;73(2): 176-187.
- 812 47. Coulter DA, Steinhauser C. Role of astrocytes in epilepsy. Cold Spring Harb

- 813 Perspect Med. 2015;5(3): a022434.
- 814 48. Seifert G, Carmignoto G, Steinhauser C. Astrocyte dysfunction in epilepsy.  
815 Brain Res Rev. 2010;63(1-2): 212-221.
- 816 49. Steinhauser C, Grunnet M, Carmignoto G. Crucial role of astrocytes in  
817 temporal lobe epilepsy. Neuroscience. 2016;323: 157-169.
- 818 50. Alvarez-Ferradas C, Morales JC, Wellmann M, Nualart F, Roncagliolo M,  
819 Fuenzalida M, et al. Enhanced astroglial Ca<sup>2+</sup> signaling increases excitatory  
820 synaptic strength in the epileptic brain. Glia. 2015;63(9): 1507-1521.
- 821 51. Gomez-Gonzalo M, Losi G, Chiavegato A, Zonta M, Cammarota M, Brondi  
822 M, et al. An excitatory loop with astrocytes contributes to drive neurons to  
823 seizure threshold. PLoS Biol. 2010;8(4): e1000352.
- 824 52. Bazargani N, Attwell D. Astrocyte calcium signaling: the third wave. Nat  
825 Neurosci. 2016;19(2): 182-189.
- 826 53. Haydon PG. GLIA: listening and talking to the synapse. Nat Rev Neurosci.  
827 2001;2(3): 185-193.
- 828 54. Weissberg I, Wood L, Kamintsky L, Vazquez O, Milikovsky DZ, Alexander A,  
829 et al. Albumin induces excitatory synaptogenesis through astrocytic  
830 TGF-beta/ALK5 signaling in a model of acquired epilepsy following blood-brain



- 831 barrier dysfunction. *Neurobiol Dis.* 2015;78: 115-125.
- 832 55. Berridge MJ, Bootman MD, Roderick HL. Calcium signalling: dynamics,  
833 homeostasis and remodelling. *Nat Rev Mol Cell Biol.* 2003;4(7): 517-529.
- 834 56. Saito K, Shigetomi E, Yasuda R, Sato R, Nakano M, Tashiro K, et al.  
835 Aberrant astrocyte Ca(2+) signals "AxCa signals" exacerbate pathological  
836 alterations in an Alexander disease model. *Glia.* 2018;66(5): 1053-1067.
- 837 57. Bedner P, Dupper A, Huttmann K, Muller J, Herde MK, Dublin P, et al.  
838 Astrocyte uncoupling as a cause of human temporal lobe epilepsy. *Brain.*  
839 2015;138(Pt 5): 1208-1222.
- 840 58. Bordey A, Lyons SA, Hablitz JJ, Sontheimer H. Electrophysiological  
841 characteristics of reactive astrocytes in experimental cortical dysplasia. *J*  
842 *Neurophysiol.* 2001;85(4): 1719-1731.
- 843 59. Bordey A, Sontheimer H. Properties of human glial cells associated with  
844 epileptic seizure foci. *Epilepsy Res.* 1998;32(1-2): 286-303.
- 845 60. Steinhauser C, Seifert G, Bedner P. Astrocyte dysfunction in temporal lobe  
846 epilepsy: K<sup>+</sup> channels and gap junction coupling. *Glia.* 2012;60(8): 1192-1202.
- 847 61. Liddel SA, Guttenplan KA, Clarke LE, Bennett FC, Bohlen CJ, Schirmer L,  
848 et al. Neurotoxic reactive astrocytes are induced by activated microglia. *Nature.*

- 849 2017;541(7638): 481-487.
- 850 62. Dheen ST, Kaur C, Ling EA. Microglial activation and its implications in the  
851 brain diseases. *Curr Med Chem*. 2007;14(11): 1189-1197.
- 852 63. Kingwell K. Neurodegenerative disease: Microglia in early disease stages.  
853 *Nat Rev Neurol*. 2012;8(9): 475.
- 854 64. Shinozaki Y, Nomura M, Iwatsuki K, Moriyama Y, Gachet C, Koizumi S.  
855 Microglia trigger astrocyte-mediated neuroprotection via purinergic  
856 gliotransmission. *Sci Repo*. 2014;4: 4329.
- 857 65. Riazi K, Galic MA, Kuzmiski JB, Ho W, Sharkey KA, Pittman QJ. Microglial  
858 activation and TNFalpha production mediate altered CNS excitability following  
859 peripheral inflammation. *Proc NI Acad Sci U S A*. 2008;105(44): 17151-17156.
- 860 66. Vezzani A, Conti M, De Luigi A, Ravizza T, Moneta D, Marchesi F, et al.  
861 Interleukin-1beta immunoreactivity and microglia are enhanced in the rat  
862 hippocampus by focal kainate application: functional evidence for enhancement  
863 of electrographic seizures. *J Neurosci*. 1999;19(12): 5054-5065.
- 864 67. John GR, Lee SC, Brosnan CF. Cytokines: powerful regulators of glial cell  
865 activation. *Neuroscientist*. 2003;9(1): 10-22.
- 866 68. Sofroniew MV. Molecular dissection of reactive astrogliosis and glial scar

867 formation. Trends Neurosc. 2009;32(12): 638-647.

868 69. Imura Y, Morizawa Y, Komatsu R, Shibata K, Shinozaki Y, Kasai H, et al.

869 Microglia release ATP by exocytosis. Glia. 2013;61(8): 1320-1330.

870 70. Shigetomi E, Hirayama YJ, Ikenaka K, Tanaka KF, Koizumi S. Role of

871 purinergic receptor P2Y1 in spatiotemporal Ca(2+) dynamics in astrocytes. J

872 Neurosci. 2018;38(6): 1383-1395.

873

#### 874 **Supporting Information**

875 **S1 Fig** Initial microglial activation is observed after SE in IP3R2KO mice.

876 **S2 Fig** Immunohistochemical analysis of GCaMP expression in the

877 hippocampus in Glast-CreERT2::Flx-GCaMP3 mice.

878 **S1 Table** Cell-specific markers in GCaMP3-expressing cells in the hippocampus

879 of Glast-CreERT2::Flx-GCaMP3 mice (tamoxifen i.p. at P7).

880 **S1 Movie** Ca<sup>2+</sup> dynamics of astrocytes in the CA1 stratum radiatum region in

881 Glast-CreERT2::flx-GCaMP3 control mice and approximately 4 weeks after SE

882 with or without minocycline treatment.

883 **S2 Movie** Ca<sup>2+</sup> dynamics of astrocytes approximately 4 weeks after SE in the

884 CA1 stratum radiatum region in Glast-CreERT2::flx-GCaMP3 mice before and

885 after TTX application.

886 **S3 Movie** Ca<sup>2+</sup> dynamics of astrocytes approximately 4 weeks after SE in the  
887 CA1 stratum radiatum region in Glast-CreERT2::flx-GCaMP3 mice before and  
888 after CPA application.

889 **S4 Movie** Ca<sup>2+</sup> dynamics of astrocytes approximately 4 weeks after SE in the  
890 CA1 stratum radiatum region in Glast-CreERT2::flx-GCaMP3 mice before and  
891 after 2-APB application.

892 **S5 Movie** Astrocytic Ca<sup>2+</sup> dynamics as revealed by Fluo4 in the CA1 stratum  
893 radiatum region in WT control, WT after SE, and IP<sub>3</sub>R2KO mice after SE.

894 **S6 Movie** Ca<sup>2+</sup> dynamics of astrocytes approximately 4 weeks after SE in the  
895 CA1 stratum radiatum region in Glast-CreERT2::flx-GCaMP3 mice.

896 **S7 Movie** Ca<sup>2+</sup> dynamics of astrocytes approximately 4 weeks after SE in the  
897 CA1 stratum radiatum region in Glast-CreERT2::flx-GCaMP3 mice with or  
898 without PLX5622 treatment.

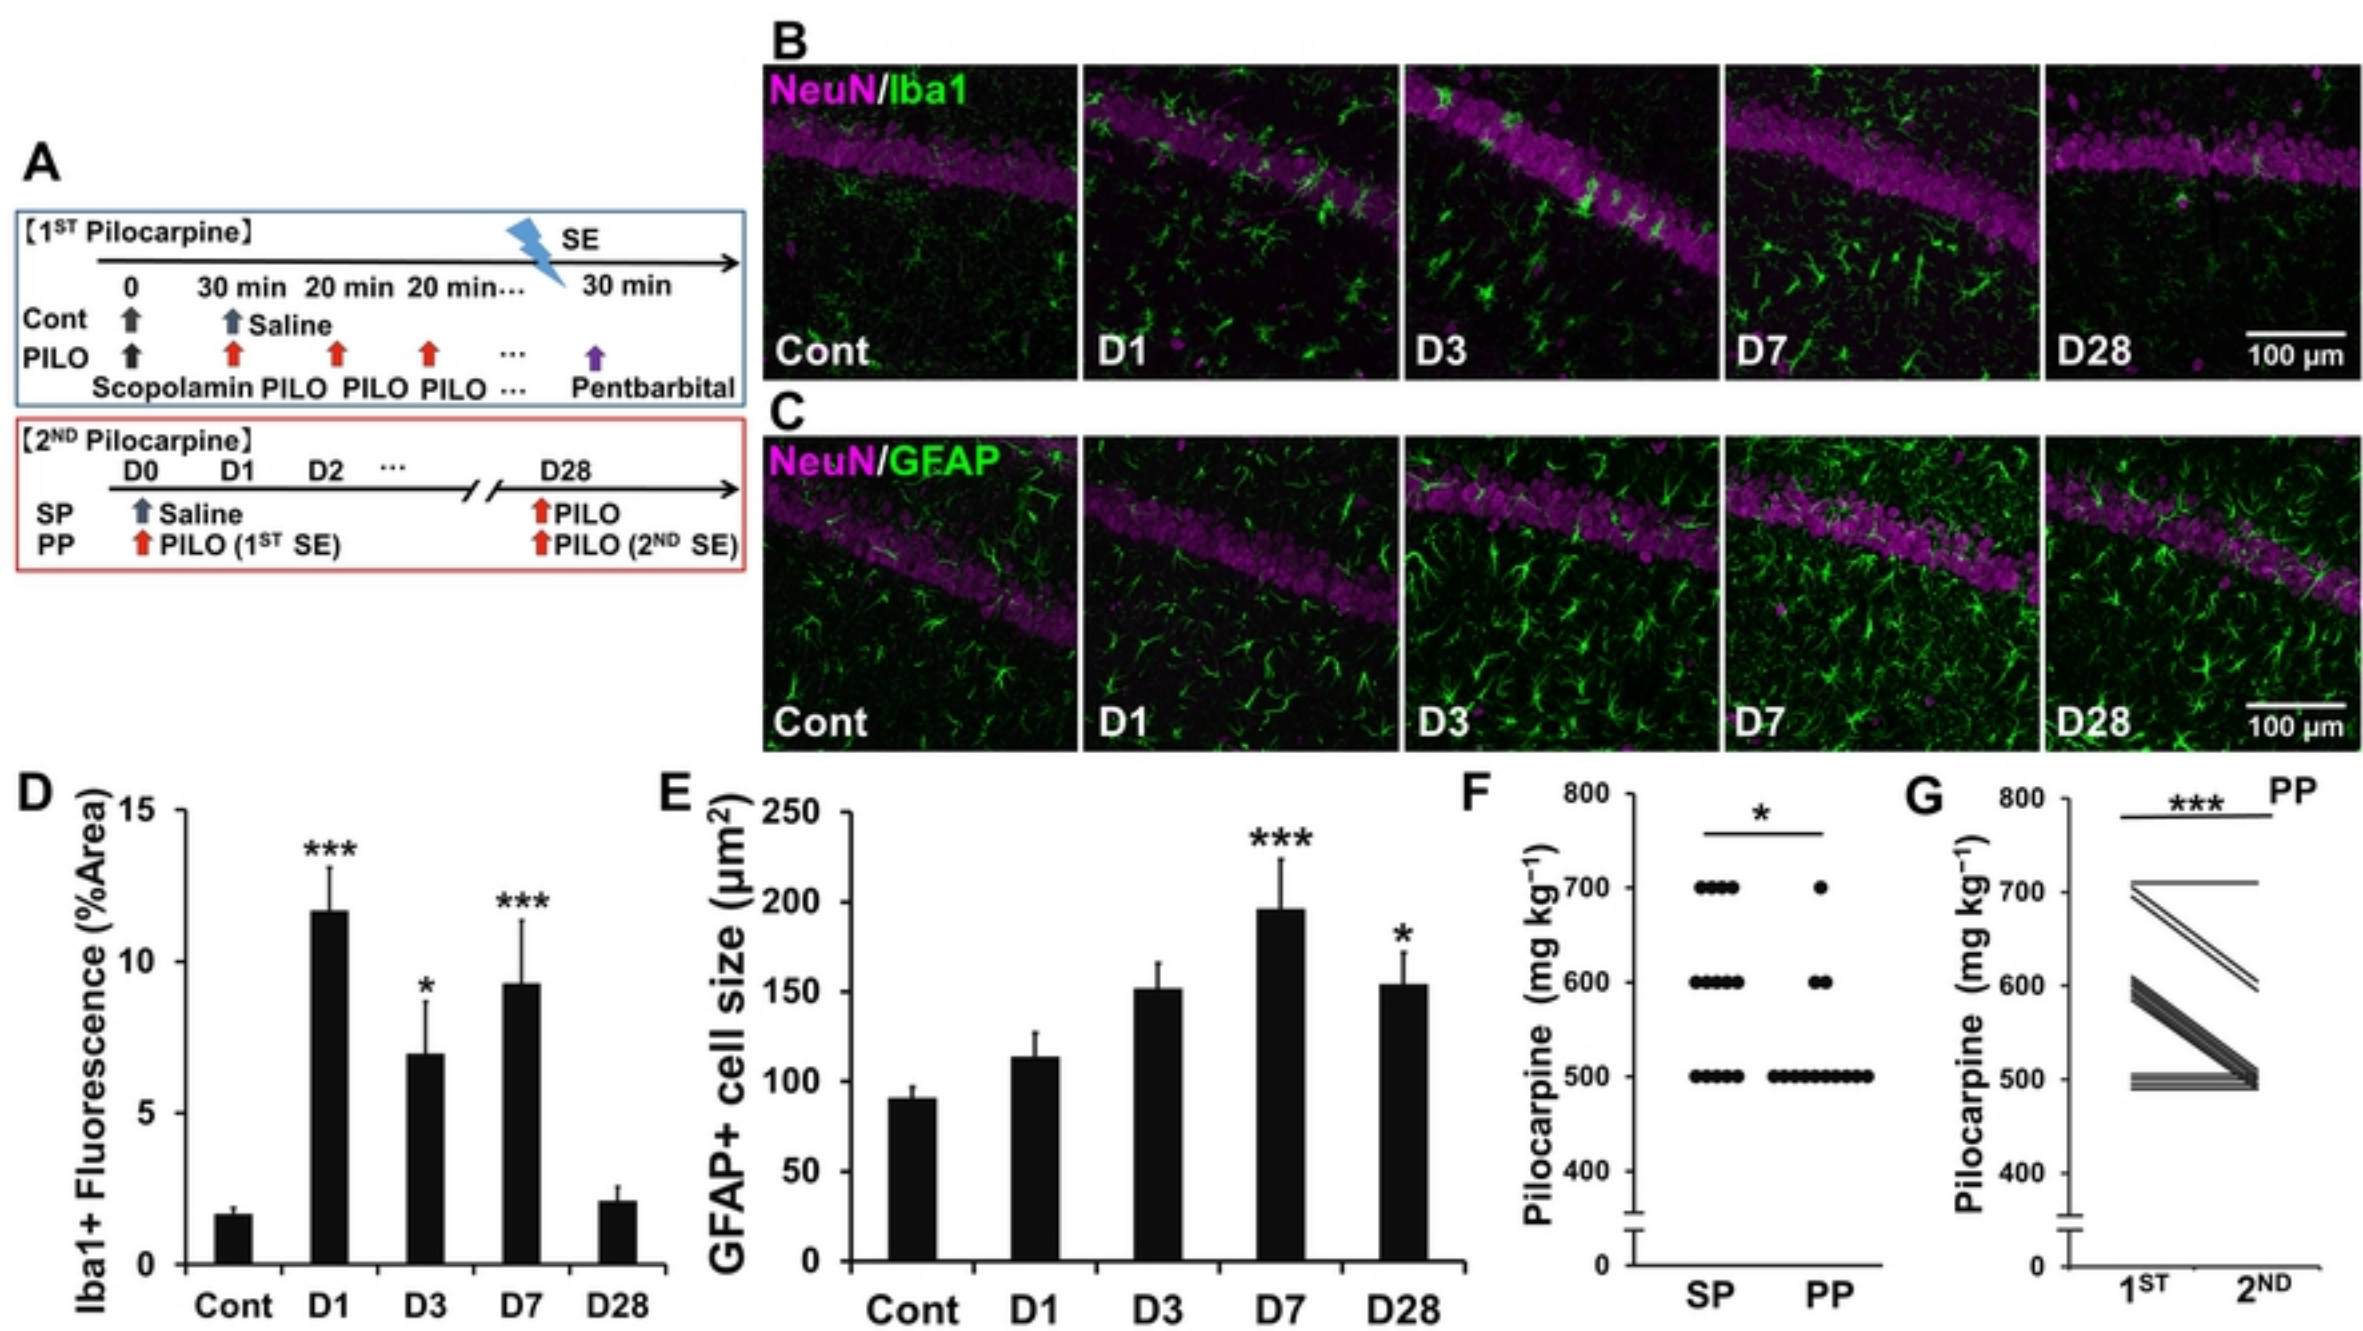

Figure 1

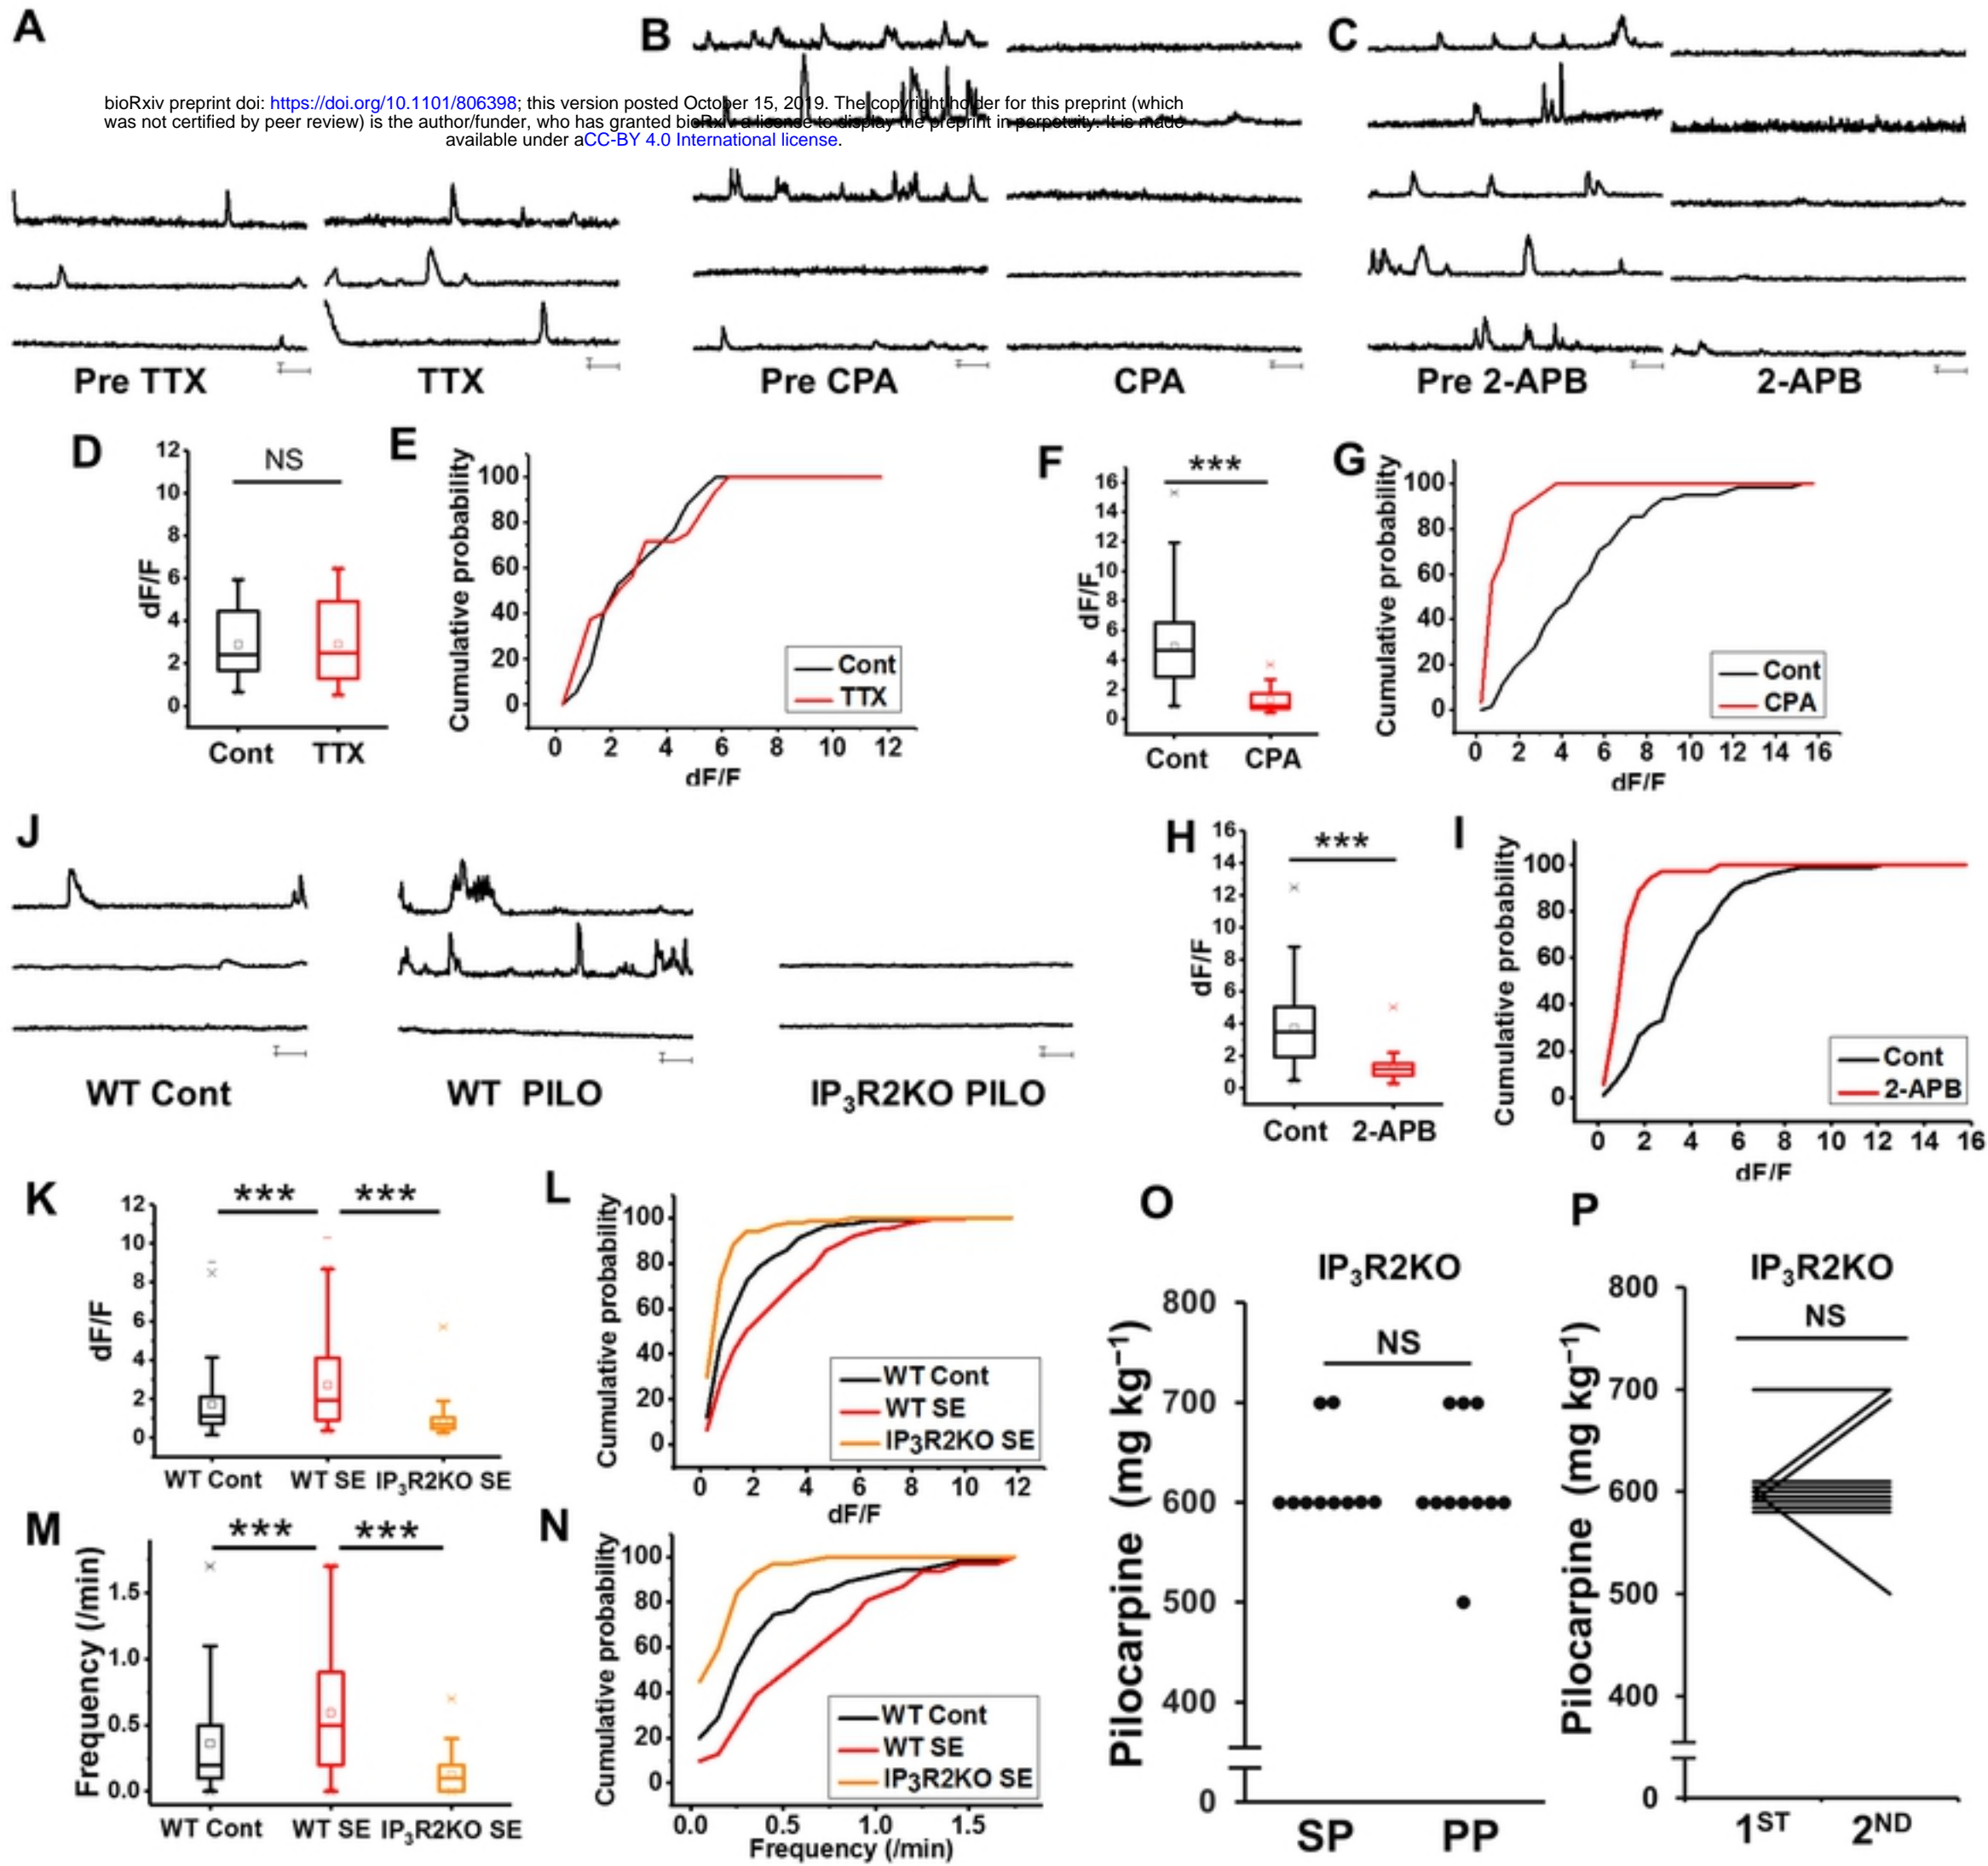

Figure 2

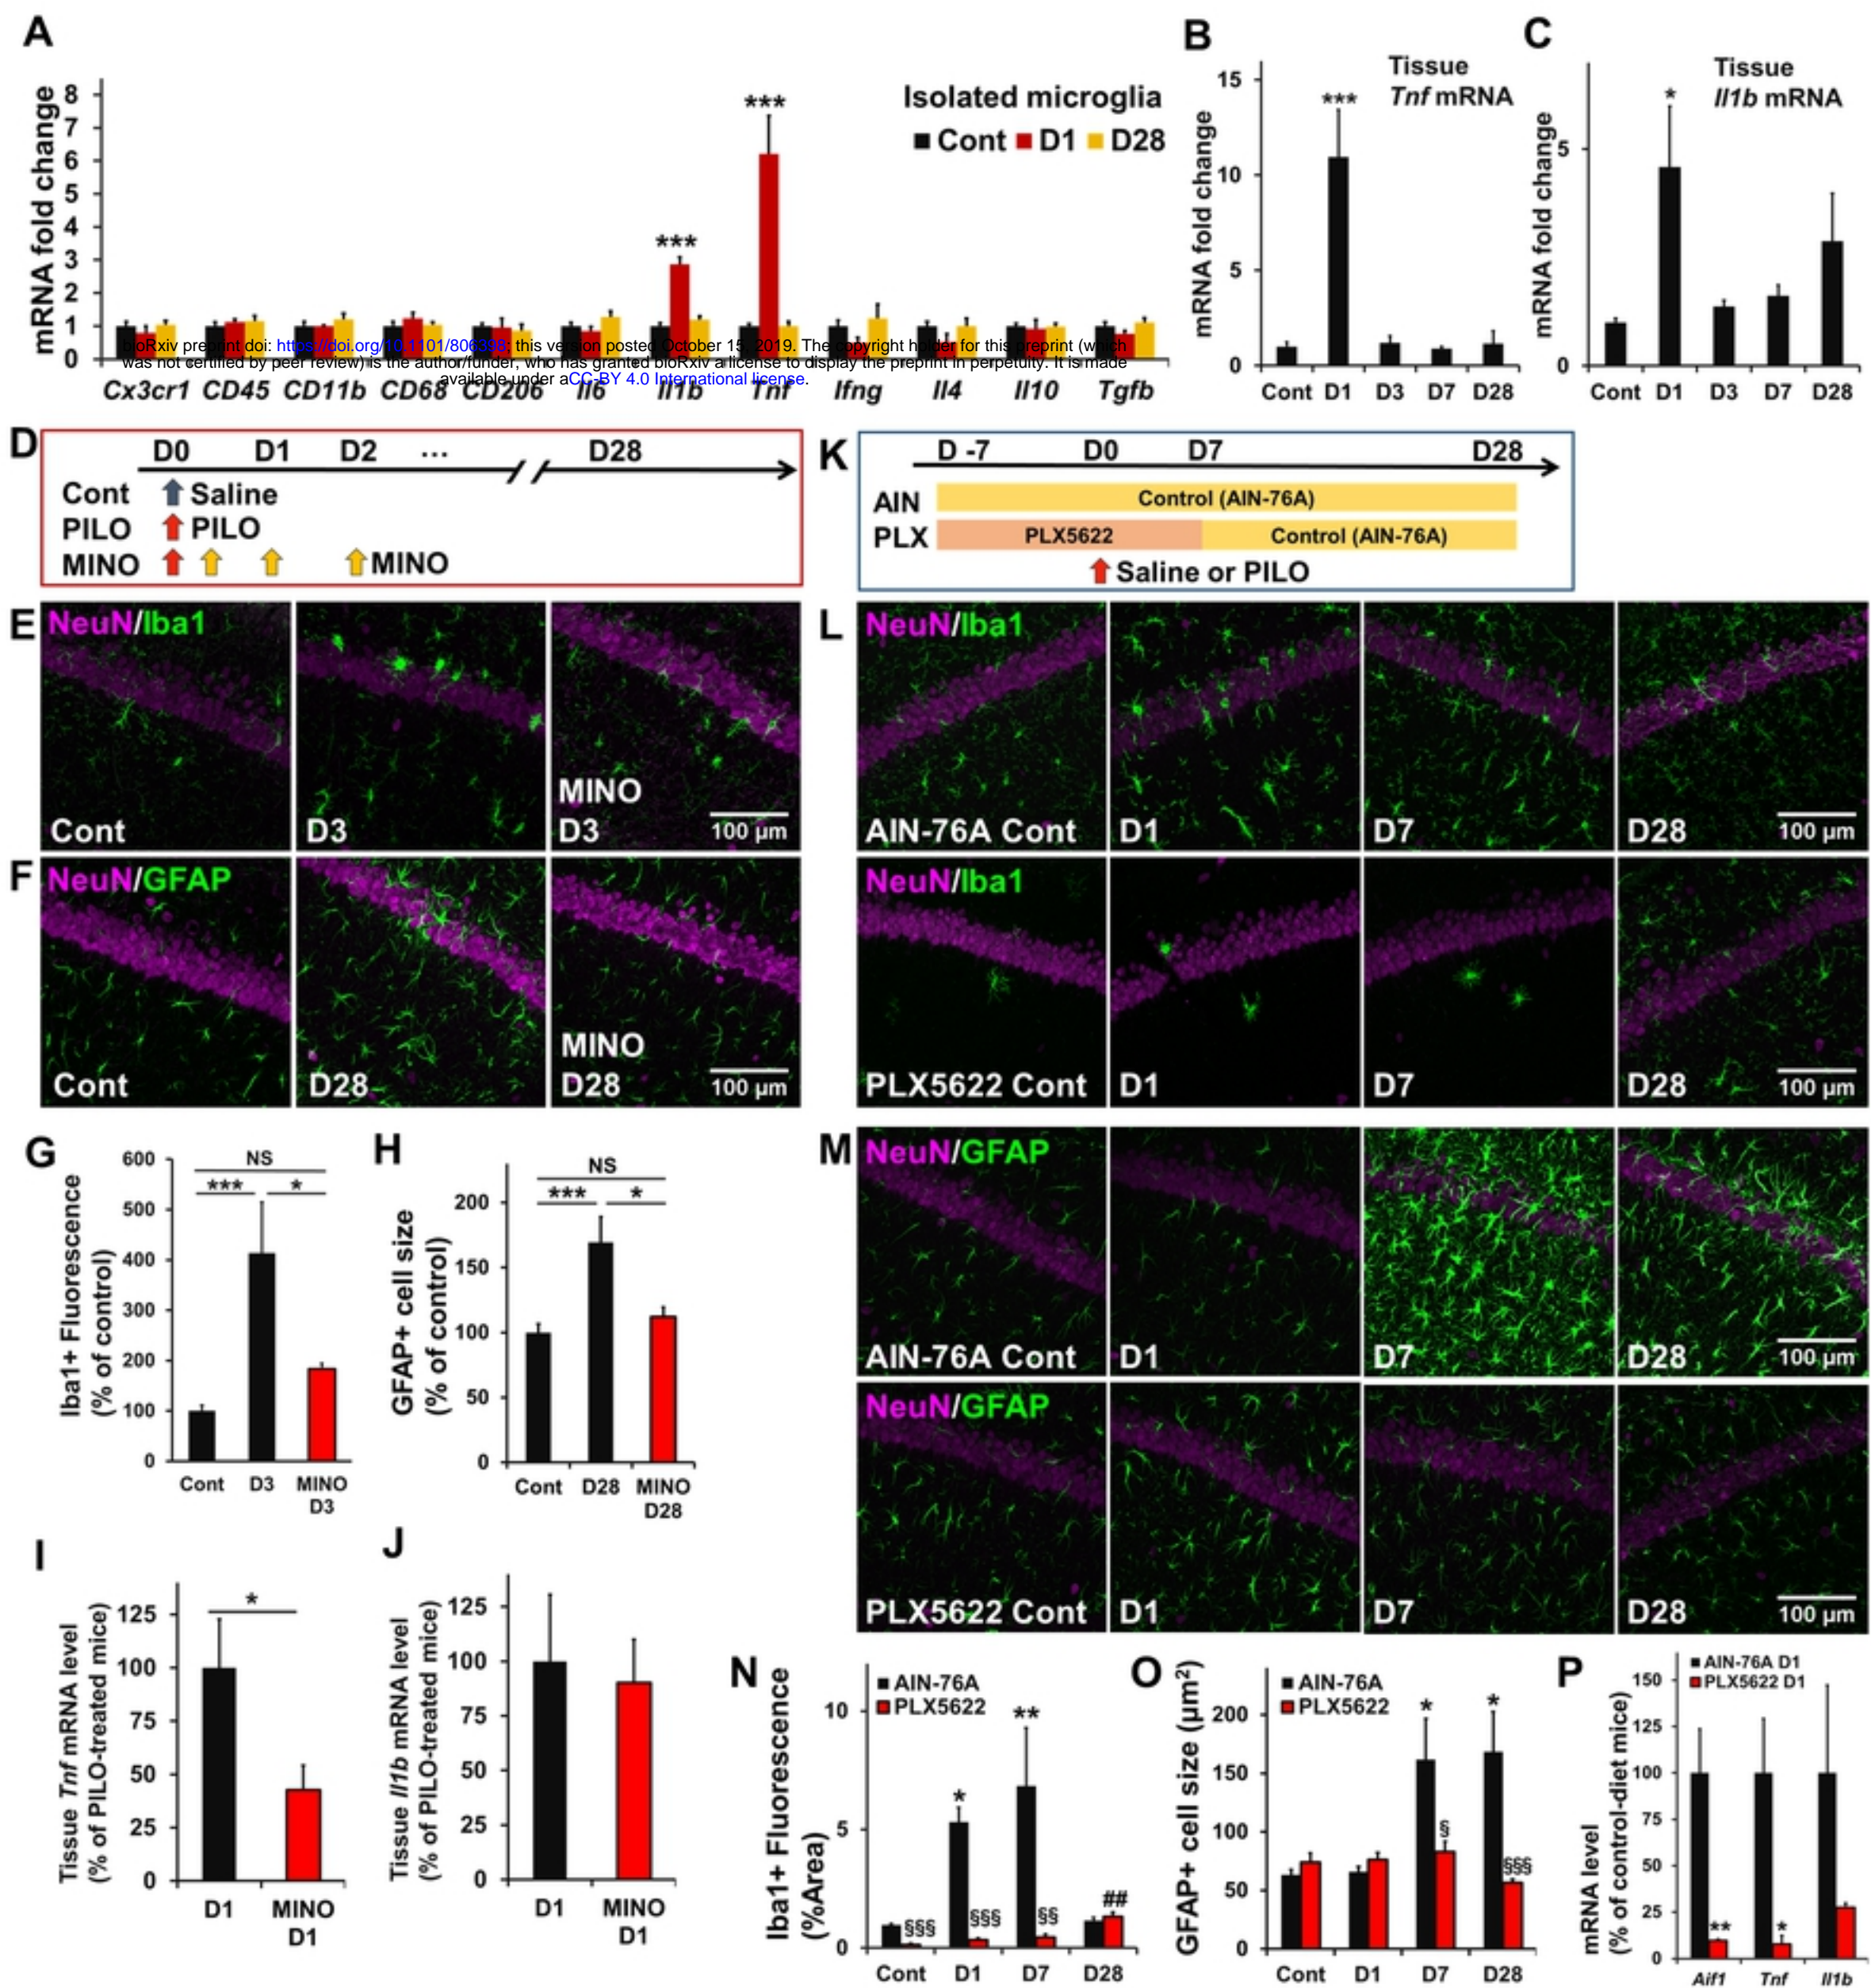

Figure 3

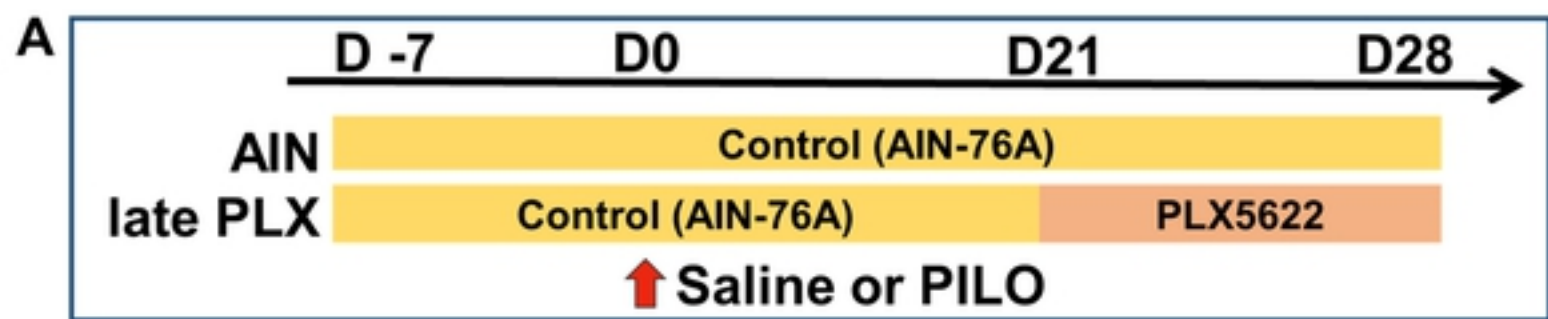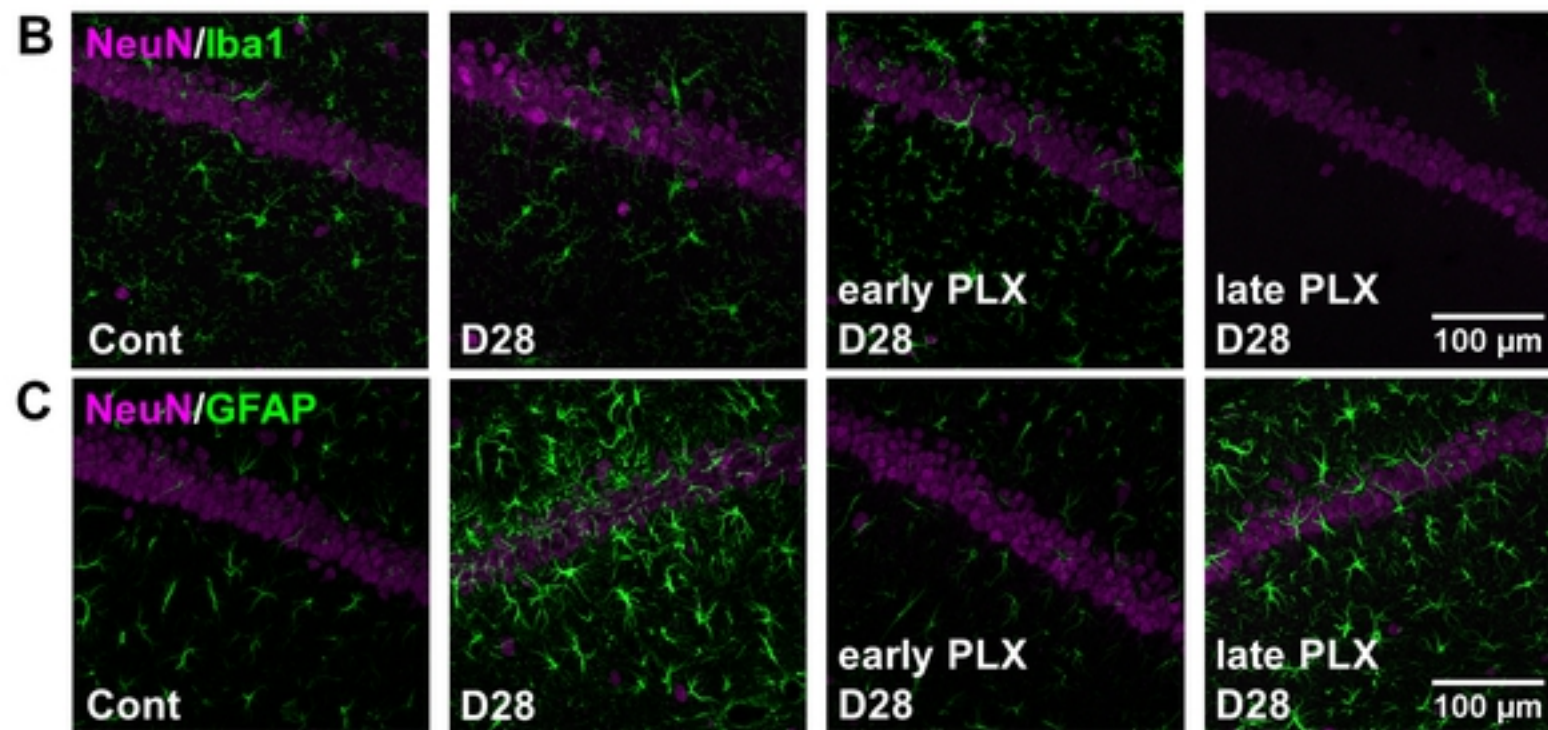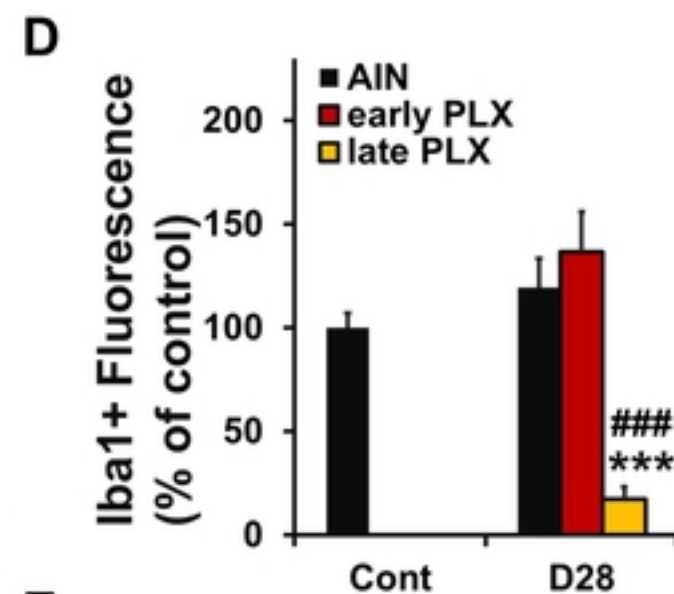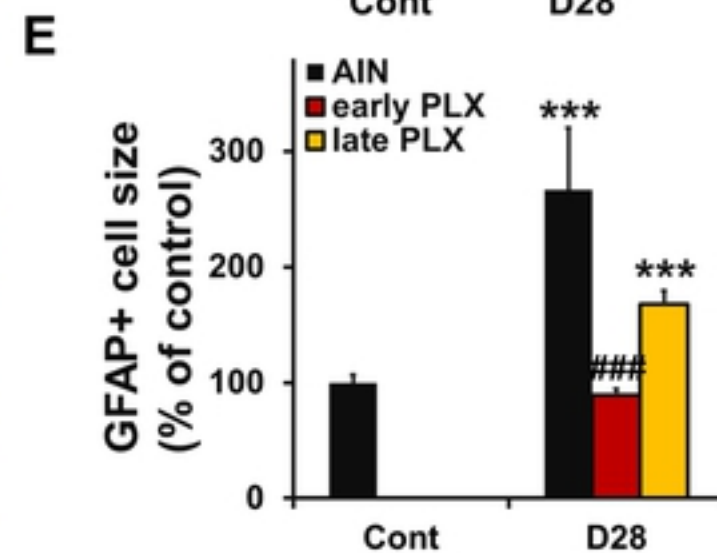

Figure 4



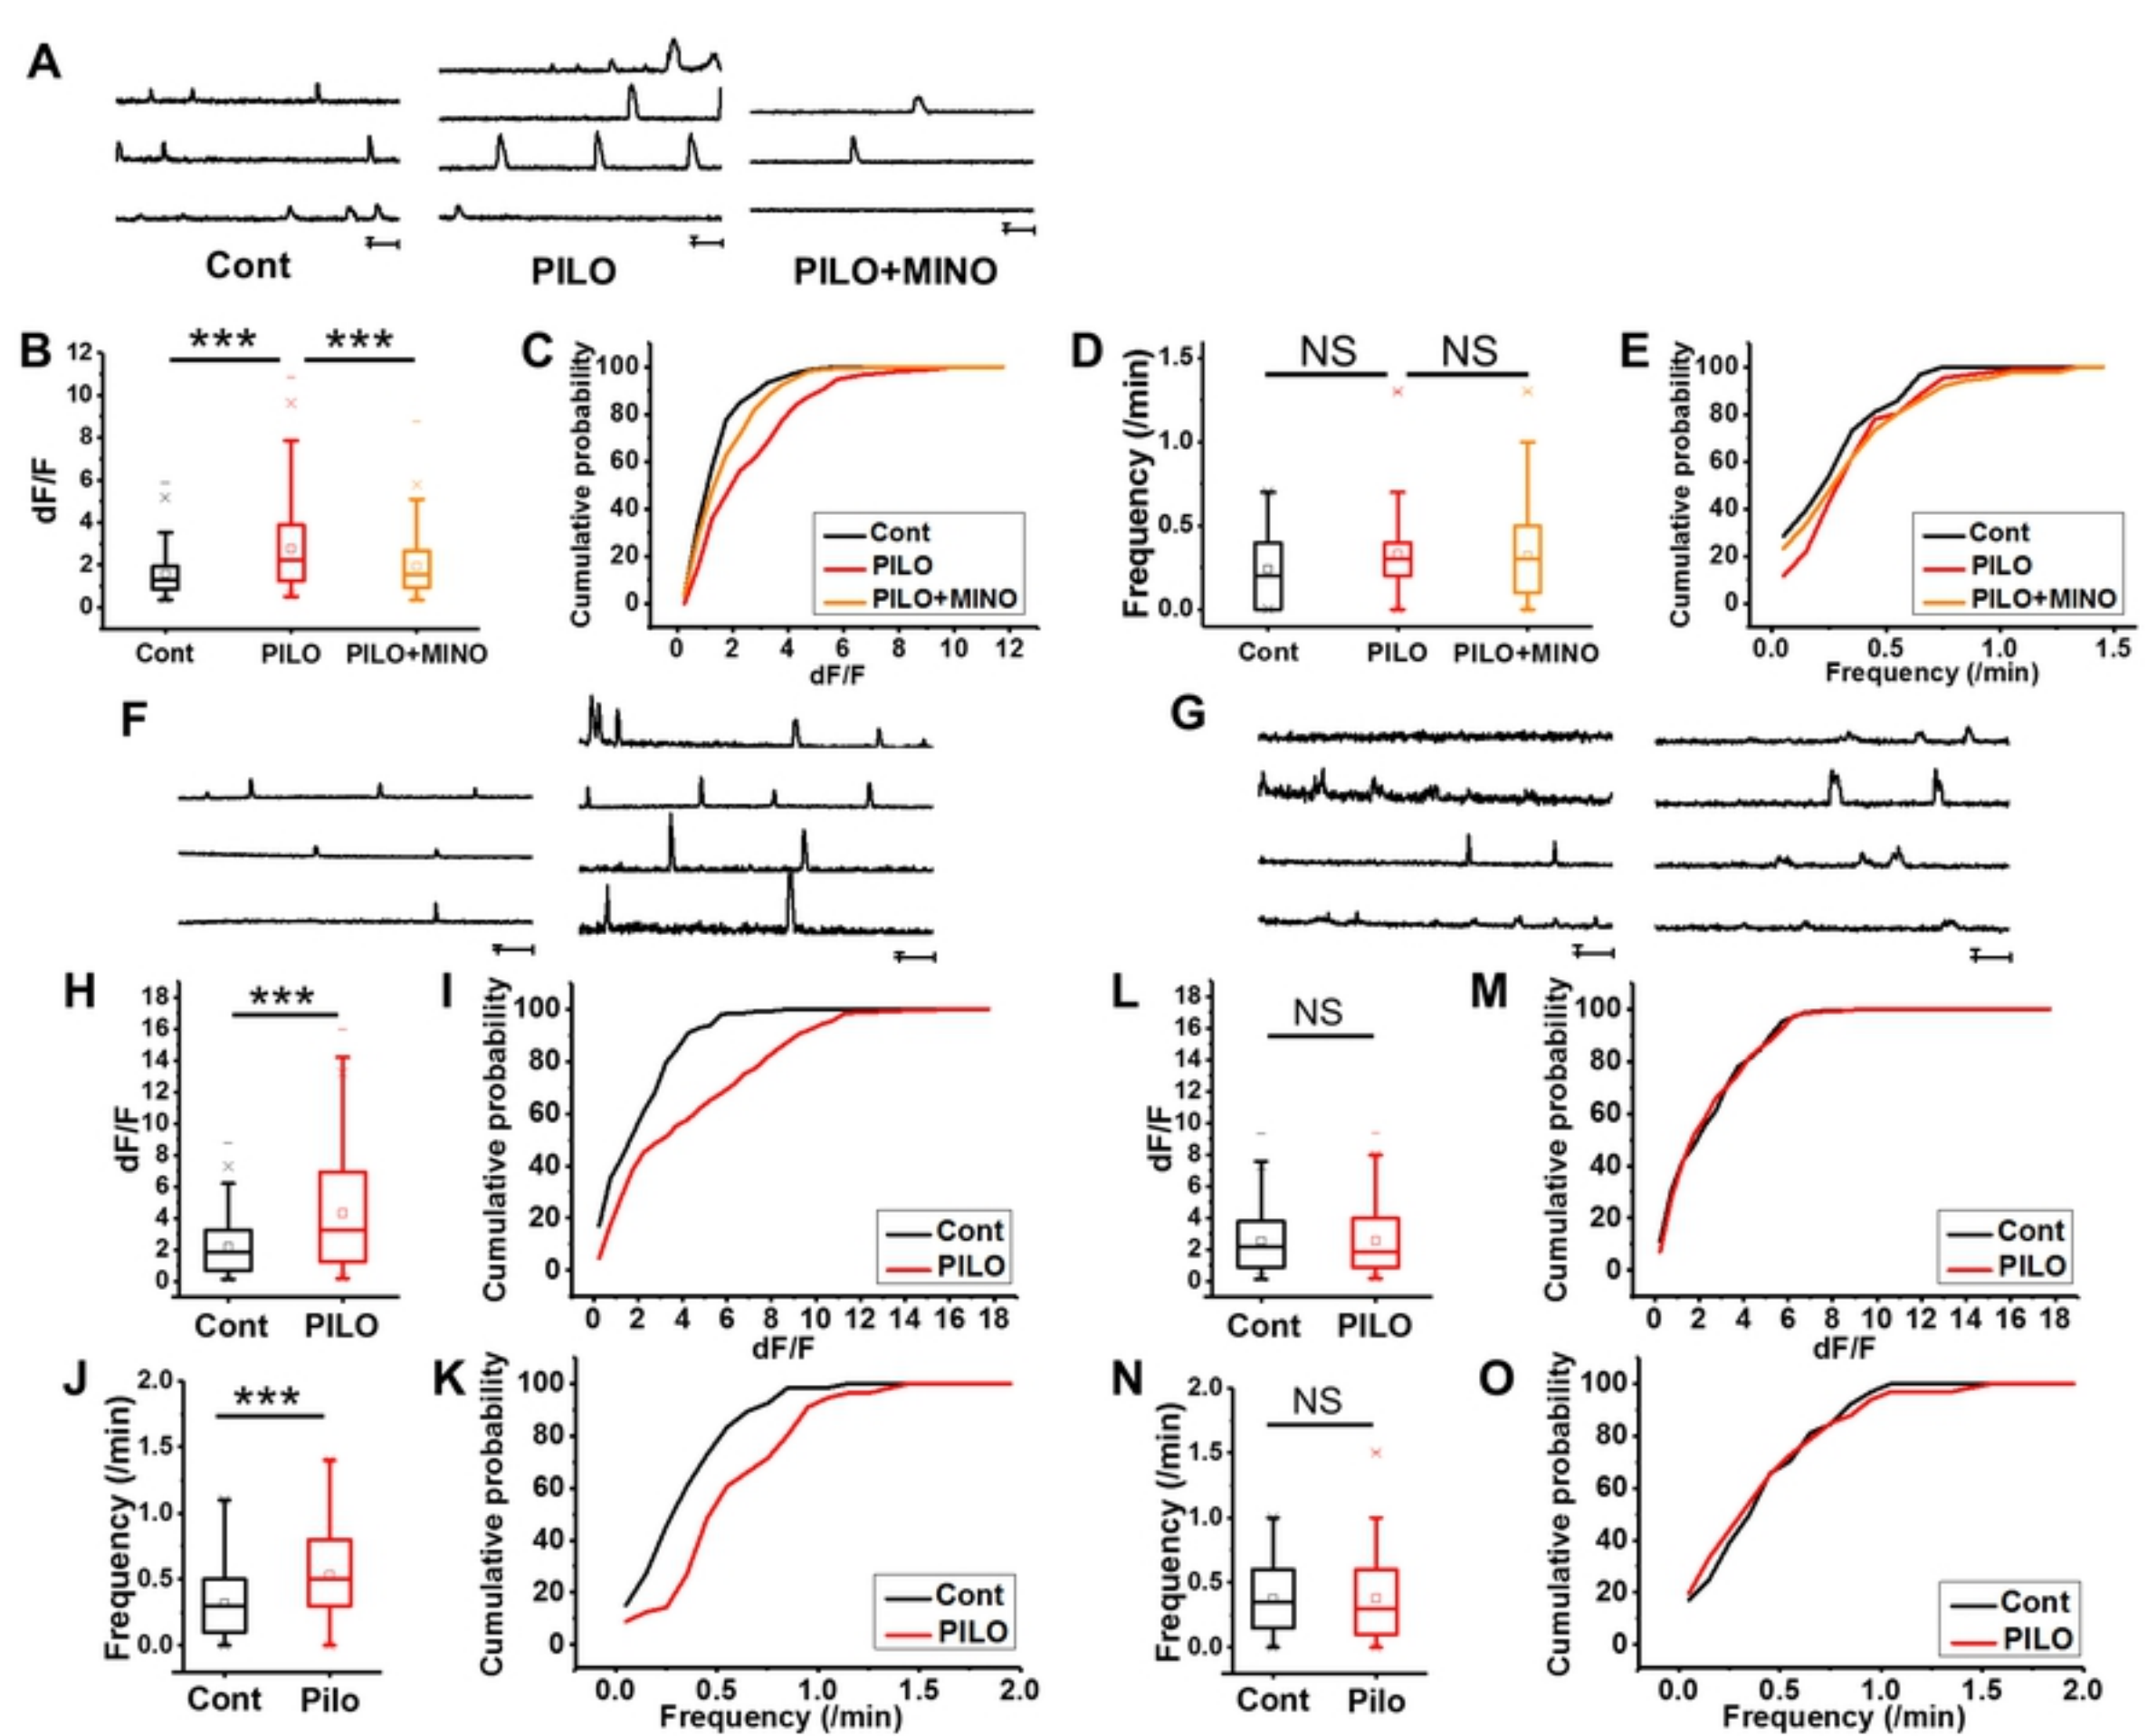

Figure 5
